1 **Short title: Microdomain coordination between neighbors in plants**

2 **Authors:**

3 Andreas Kolbeck<sup>1,4</sup>, Peter Marhavý<sup>1,4,5¶</sup>, Damien De Bellis<sup>1,2</sup>, Baohai Li<sup>3,6</sup>,  
4 Takehiro Kamiya<sup>3</sup>, Toru Fujiwara<sup>3</sup>, Lothar Kalmbach<sup>1,†</sup> and Niko Geldner<sup>1,§,‡</sup>

5

6 **Title: CASP microdomain formation requires cross cell wall stabilization of**  
7 **domains and non-cell autonomous action of LOTR1**

8

9 **Author affiliations and footnotes**

10 1 Department of Plant Molecular Biology, University of Lausanne,  
11 Lausanne, Switzerland

12 2 Electron Microscopy Facility, University of Lausanne, Lausanne,  
13 Switzerland

14 3 Department of Applied Biological Chemistry, The University of Tokyo,  
15 Tokyo, Japan

16 4 These authors contributed equally

17 5 Present address: Umeå Plant Science Centre (UPSC), Department of  
18 Forest Genetics and Plant Physiology, Swedish University of Agricultural  
19 Sciences (SLU), Umeå, Sweden

20 6 College of Environmental and Resource Sciences, Zhejiang University,  
21 China

22 7 Present address: Sainsbury Laboratory, University of Cambridge,  
23 Bateman Street, Cambridge CB2 1LR, UK

24 8 Corresponding author. Tel: +41 21 692 4192;

25 E-mail: [niko.geldner@unil.ch](mailto:niko.geldner@unil.ch)

26

27

28 **Summary**

29 Efficient uptake of nutrients in both animal and plant cells requires tissue-  
30 spanning diffusion barriers separating inner tissues from the outer  
31 lumen/soil. However, we poorly understand how such contiguous three-  
32 dimensional superstructures are formed in plants. Here, we show that  
33 correct establishment of the plant Casparian Strip (CS) network relies on  
34 local neighbor communication. We show that positioning of Casparian Strip  
35 membrane domains (CSDs) is tightly coordinated between neighbors in  
36 wild-type and that restriction of domain formation involves the putative  
37 extracellular protease LOTR1. Impaired domain restriction in *lotr1* leads to  
38 fully functional CSDs at ectopic positions, forming “half strips” LOTR1  
39 action in the endodermis requires its expression in the stele. LOTR1  
40 endodermal expression cannot complement, while cortex expression  
41 causes a dominant-negative phenotype. Our findings establish *LOTR1* as a  
42 crucial player in CSD positioning acting in a directional, non-cell-  
43 autonomous manner to restrict and coordinate CS positioning.

44

45 **Keywords**

46 Endodermis, Casparian Strips, extracellular diffusion barriers, membrane  
47 domains, coordination, cell ablation

## 48 **Introduction**

49 Plants mine the surrounding soil for water and dissolved minerals to  
50 sustain their growth and to complete their life cycle. Likened to inverted  
51 guts, roots evolved crucial epithelial functions — selective uptake and  
52 diffusion barriers — in order to generate and sustain body homeostasis in  
53 variable and harsh environments. In gut epithelial cells, the required  
54 separation of outside lumen and inside tissues is achieved through the  
55 formation of tight junctions. These specialized membrane domains form  
56 ring-like domains between the apical (gut lumen) and basal (blood stream)  
57 sides. Close adhesion of both adjacent plasma membranes is achieved by  
58 tight interaction of occludins, claudins, and cadherins, organized into tight  
59 and adherens junctions, forming impermeable and mechanically-resistant  
60 barriers. In plants, a functionally similar diffusion block is achieved by  
61 Casparian strips (CS), highly localized impregnations of the cell wall, the  
62 plant's extracellular matrix, in root endodermal cells.

63 Similar to tight/adherence junctions, a specialized membrane domain  
64 (Casparian Strip membrane Domain, CSD) forms a precise ring in  
65 transversal and anticlinal membranes of elongated endodermal cells. This  
66 domain acts as a molecular fence that separating the endodermal plasma  
67 membranes into peripheral (outer) and central (inner) domains,  
68 highlighted by the polar distribution of nutrient transporters (Julien  
69 Alassimone, Naseer, and Geldner 2010; Bao et al. 2019; Ma et al. 2007;  
70 Takano et al. 2010). CASPARIAN STRIP DOMAIN PROTEINs (CASPs) are  
71 specifically targeted to this domain and form a stable matrix for the  
72 subsequent lignification machinery (Roppolo et al. 2011; Lee et al. 2013;  
73 Hosmani et al. 2013; Kalmbach et al. 2017; Barbosa, Rojas-Murcia, and  
74 Geldner 2019). Lignification of the primary cell wall of CSs extends through  
75 the entire apoplast including cross-linkage to the middle lamella. This is  
76 illustrated in cell wall digestions leaving only the resistant lignified tissues  
77 of CSs and xylem visible as a fishnet-like matrix (Enstone, Peterson, and Ma  
78 2002).

79 The CS and tight/adherens junctions must form a contiguous network in  
80 order to fulfill their role as functional diffusion barriers. However, we still  
81 poorly understand how such a supracellular structure is coordinated within  
82 the endodermal cell layer. Although we are ignorant of the mechanism, the  
83 precisely opposing localization of CSDs evidences that endodermal cells  
84 coordinate the positioning of their membrane domains across the cell wall  
85 space. In epithelial cells, adherens junctions are first initiated by cell-to-cell  
86 contact mediated by nectins and cadherins and kept in place by firm  
87 attachment to the actin cytoskeleton (Rajasekaran et al. 1996; Itoh and  
88 Bissell 2003). In plant cells, their cell wall matrices separate neighboring  
89 cells by at least 100-200 nm, which prevents such a direct interaction of  
90 membrane bound proteins. Thus, a more complex positioning mechanism  
91 that requires local signals from directly adjacent neighbors could ensure  
92 coordination of CSDs between neighbors.

93 Many components necessary for correct CS formation have been identified  
94 in recent years, but few show impacts on CS positioning *per se*. Mutation of  
95 components in the recently discovered barrier surveillance mechanism  
96 causes interrupted, but correctly localized CSDs (Pfister et al. 2014; Doblaz  
97 et al. 2017; Nakayama et al. 2017; J Alassimone et al. 2016). Loss of the  
98 endodermal differentiation transcription factor MYB36 abolishes the  
99 formation of the entire CSD while disruption of CS cell wall localised ESB1  
100 causes unstable, but still correctly localised domains (Kamiya et al. 2015;  
101 Liberman et al. 2015; Hosmani et al. 2013). The recently published *lotr2*  
102 mutant revealed the importance of a member of the exocyst complex,  
103 *EXO70A1*, in mediating targeted secretion of CASP proteins to the pre-  
104 established CSD (Kalmbach et al. 2017). However, the fragmented domains  
105 visible in this mutant are non-functional and unstable. Thus, based on  
106 current data, it is unclear whether formation of functional CSDs at ectopic  
107 positions is even possible.

108 Here, we report that the recently discovered *lotr1* mutant forms fully  
109 functional CSDs outside the endodermal-endodermal cell interface in. We  
110 establish that neighbouring endodermal cells are absolutely required to



111 form stable and continuous CSDs and we highlight close coordination of  
112 CSD microdomains during the early stages of domain formation. In  
113 addition, we demonstrate that *LOTR1* is crucial for restriction of the CSD  
114 and that it acts independently of any known pathway for CSD formation.  
115 We show that this new type of putative cell wall protease is expressed in  
116 the stele, represents a novel, non-cell-autonomous and directional  
117 signalling component that controls CSD stability in the endodermis. Thus,  
118 we demonstrate that signalling, both within and between cell layers is  
119 crucial for coordinating CS positioning.

120

## 121 **Results**

### 122 *Ectopic CASP deposits in *lotr1* are fully functional CSDs*

123 During their initial characterization of the *lotr1* mutant, Li et al. 2017  
124 reported a novel ‘patchy’ phenotype, where large patches of the Casparian  
125 strip membrane domain marker CASP1::CASP1-GFP occurred outside of the  
126 regular median CS position. Further analysis revealed an apoplastic delay  
127 phenotype attributed to large gaps that could be observed in the CS upon  
128 lignin stain. We performed a more detailed analysis of the domain marker  
129 CASP1::CASP1-GFP in this mutant background to search for disruptions in  
130 the CSD that could explain these gaps in lignification. Confirming the earlier  
131 findings (Li et al. 2017), we found large patches of CASP1-GFP occurring in  
132 endodermal membranes that were never observed in wildtype plants (Fig.  
133 1B). Whereas previously reported to occur only facing pericycle cells, we  
134 found similar patches to also occur towards the outer cortex (Fig. 1B, Fig.  
135 S1A), although quantification revealed a clear preference for the  
136 endodermal-pericycle interface (Fig. S1B). In addition to these patches, we  
137 found disruptions of the central CSD which occurred primarily at cell  
138 corners with nearby ectopic CASP deposits (Fig. 1B), coherent with the  
139 reported gaps in CS lignin. The overall correctly positioned and largely  
140 continuous central CSD in *lotr1* suggests that the core-localization  
141 mechanism for the CSD is still functional. We speculate that the change in  
142 cell shape and cell walls at junctions might favor patch formation in *lotr1*. If  
Page | 5

143 patch formation starts simultaneously with initial focalization of CASPs into  
144 micro-domains (known as the string-of-pearls stage), nearby ectopic CASP  
145 deposits might inhibit the growth of the central domain leading to the  
146 observed large discontinuities. In order to better understand the nature  
147 and origin of these patches, we followed CASP deposition throughout  
148 endodermal differentiation. In both wildtype and *lotr1*, CASP1-GFP  
149 aggregated into aligned micro-domains in the cell's median (Fig. S1C).  
150 During this initial focalization step, we observed occurrence of ectopic  
151 CASP islands in *lotr1*, indicating a role of LOTR1 during this early step of  
152 defining the CS location. Ectopic CASP deposits grew over time and were  
153 able to fuse into larger patches, similarly to the central micro-domains  
154 combining into a continuous ring. We did not observe degradation of these  
155 patches nor formation of new patches once the central domain was fused,  
156 confirming that these patches are stable once formed and their  
157 establishment is restricted to the short developmental window in which  
158 the cells determine their CS location. Consequently, LOTR1 likely acts in  
159 this early phase as an inhibitor of ectopic domain formation. We then  
160 investigated whether these patches represent fully functional domains, i.e.  
161 whether they are able to guide lignification enzymes to these sites.  
162 Deposition of lignin can be easily identified in electron microscopy, where  
163 CSs are visible as a clearly defined, homogenous stretch of cell wall  
164 spanning the entire apoplastic space (Roppolo et al. 2011; Fujita et al.  
165 2020) (Fig. S1D). Ultra-structure analysis of *lotr1* revealed similar cell wall  
166 modifications in pericycle-facing endodermal membranes (Fig. 1D). To our  
167 surprise, and in contrast to regular CSs, this ectopic lignin patch was  
168 restricted to the endodermal part of the cell wall, stopping precisely at the  
169 middle lamella, effectively creating half of a Casparian Strip. Such a strict  
170 spatial confinement of lignification on a nanometer scale is quite surprising  
171 since monolignols and ROS, both essential for lignin polymerization, are  
172 thought to be mobile in cell walls and lignin polymerization itself not to be  
173 under direct enzymatic control. To our knowledge, such a strictly restricted  
174 lignification encompassing only half of a thin primary has not been  
175 observed previously. Our finding therefore suggests a very local and

176 directed lignin polymerization in the CS, where each endodermal cell is  
177 responsible for lignifying their part of the cell wall to build a functional CS  
178 barrier. A functional CSD is also characterized by a tight attachment of the  
179 underlying membrane, which is revealed in EM by the mild plasmolysis of  
180 the plasma membrane introduced through sample preparation, and which  
181 is absent at the CSD. Perfectly matching the cell autonomous nature of the  
182 ectopic patches, tight attachment of the endodermal plasma membrane,  
183 but not the pericycle plasma membrane was observed.

184 In order to further support our hypothesis that *lotr1* ectopic patches are  
185 fully functional domains, we compared consecutive electron micrograph  
186 sections with and without potassium permanganate (KMnO<sub>4</sub>) staining to  
187 check for lignification. Depositing electron dense material by reaction with  
188 lignin sidechains, KMnO<sub>4</sub> highlights lignin presence as darkening of cell  
189 walls in Casparian strips and protoxylem vessels (Stein, Klomparens, and  
190 Hammerschmidt 1992; Yamashita et al. 2016). Ectopic patches in *lotr1*  
191 displayed KMnO<sub>4</sub> staining on the endodermal side of the half-strips, while  
192 the opposite pericycle cell walls were unstained (Fig. 1E). This correlated  
193 with CS-typical cell wall appearance (more homogenous, less electron-  
194 dense, slightly thickened) observed in unstained consecutive cuts,  
195 confirming lignin presence at these ectopic domains. Notably, several  
196 samples displayed CS-type cell wall morphology with accompanying  
197 membrane attachment and lignification throughout the entire endodermal  
198 cell corner, stretching from the median endodermal-cell interface all the  
199 way to the endodermal-pericycle cell walls (Fig. S1E). Although ectopic  
200 lignification is a hallmark of many Casparian Strip mutants, this was not  
201 described for *lotr1*. Furthermore, enhanced lignification itself does not  
202 result in firm membrane attachment outside the regular CS. Consequently,  
203 this points to a drastically enlarged CSD indicative of an impaired ability to  
204 restrict CSD growth in *lotr1*, agreeing with a presumed role of LOTR1 as  
205 inhibitor of domain formation.

206 The regular CSD recruits a multitude of enzymes required for restricted  
207 monolignol polymerization to form the CS. The tightly restricted lignin

208 accumulation at ectopic *lotr1* patches suggested similar recruitment of  
209 these enzymes. Indeed, when we co-expressed the CSD marker CASP1-GFP  
210 together with typical members of this lignin machinery in *lotr1* to confirm  
211 their recruitment to ectopic CSDs. Endodermis specific PEROXIDASE 64  
212 (PRX64) and LACCASE 3 (LAC3) displayed a clear co-labelling in both central  
213 and ectopic domains while NADPH oxidase RbohF, the main generator of  
214 ROS for monolignol polymerization, was also found to be present, although  
215 it did not specifically accumulate there (Fig. 1F). Finally, we analyzed the  
216 localization of dirigent-domain protein ESB1 in *lotr1*. Although it was  
217 previously reported to be absent from ectopic deposits (Li et al. 2017). We  
218 found ESB1 to accumulate at the sites of ectopic CASP1-deposition when  
219 expressed as ESB1-mCherry under its native promoter together with  
220 CASP1-GFP. Dirigent-domain proteins are thought to be a key component  
221 in restricting and directing lignin polymerization in the cell wall (Hosmani et  
222 al. 2013). Our results of ESB1 localization therefore agree with PER64 and  
223 LAC3 labelling, as well as the tight restriction of lignin at these patches,  
224 proving these ectopic formations to be fully functional, but ectopically  
225 formed CSDs.

#### 226 *Focalization of CASPs is coordinated between cells*

227 The fact that an ectopic CSD patch towards a non-endodermal neighbor  
228 can only induce formation of a half-strip suggested that two neighboring  
229 endodermal cells absolutely need to align their respective CSDs in order to  
230 lignify the entire CS cell wall space. To ensure this, a mechanism would  
231 need to be in place that promotes formation of a CSD at places where a  
232 neighboring cell is forming one and/or inhibits CSD formation in the  
233 absence of a neighboring CSD. We therefore investigated the initial  
234 focalization of CASP proteins at high resolution. When properly aligned  
235 along the z-axis, we were able to identify two distinct membrane signals  
236 present between two neighboring endodermal cells (Fig. 2A,C). Strikingly,  
237 at the string-of-pearls stage, CASP1-GFP intensity along the length of both  
238 signals already showed a strong positive correlation ( $R^2 = 0.535$ ,  $p = 1.612$   
239  $e-9$ ) (Fig. 2B), indicating coordination of CSD formation across the cell wall

240 already at this stage. To validate our assumption that these paired signals  
241 represent the signals of neighboring cell membrane domains, we checked  
242 the position of CS cell wall protein ESB1 and cell wall tracer Propidium  
243 Iodide (Fig. 2C,D). In contrast to CASP1-GFP, ESB1-mCherry localized in a  
244 single line in between the observed CASP-labelled membranes in both early  
245 and late CSDs (Fig. 2C). To further confirm that these GFP signals truly  
246 represented separate membranes, we decided to employ cell-specific laser  
247 ablation to destroy one of the cells, arguing that this should remove only  
248 one half of the paired signal. Indeed, upon ablation, GFP signal was  
249 specifically lost in the ablated cell whereas the adjacent signal of the intact  
250 neighboring cell was unchanged (Fig. 2D,E). Together, our data  
251 demonstrate the observed double signals to be adjacent CSDs of  
252 neighboring endodermal cells, whose initial formation is tightly  
253 coordinated between cells. We then investigated whether currently known  
254 mutants such as *sgn1*, *sgn3* and *esb1* would display defects in CASP  
255 microdomain coordination (Fig. S2A). However, all these mutants showed  
256 wildtype like coordination between adjacent CSDs. Interestingly, *lotr1* also  
257 showed well-coordinated deposition of micro-domains at the Casparian  
258 strip position. Therefore, while LOTR1 appears to be necessary to restrict,  
259 unpaired, ectopic domain establishment, its loss-of function does not seem  
260 to affect the process of coordination at the correct central position where  
261 the future CS between neighboring cells is forming. This is corroborated by  
262 the lack of CS half-strips at the regular median position between  
263 endodermal cells in *lotr1* (Fig. S2A).

#### 264 *Endodermal cells require a neighboring cell to stabilize CASPs*

265 The close correlation of CASP micro-domains in neighboring endodermal  
266 membranes could be explained by an unknown feedback control  
267 mechanism that stabilizes microdomains upon presence of neighboring  
268 domains and de-stabilizes them in their absence. Such a mechanism would  
269 immediately guide CSD formation towards endodermis-endodermis  
270 surfaces. In order to test this model, we ablated individual endodermal  
271 cells in the elongation zone, prior to their transition to differentiation. This

272 enabled us to compare CSD establishment with and without a functional  
273 neighbor in the same cell. Initially, we observed CASP deposition in a string-  
274 of-pearls-typical pattern in membranes facing living and dead cells alike  
275 (Fig. 3A,D). However, only membranes facing intact neighbors were able to  
276 form a continuous strip, whereas domains towards ablated cells did not  
277 progress past the string-of-pearls stage. When we ablated all adjacent cells,  
278 the single intact cell was still able to express and focalize CASPs but was  
279 unable to establish any continuous domains (Fig. 3C). We also noticed a  
280 strong difference in signal intensity between membranes facing living and  
281 dead cells, where GFP signal increased rapidly in CSDs towards intact  
282 neighbors, but not ablated cells (Fig. 3B). This discrepancy is likely a result  
283 of an inability to recruit additional CASP proteins to the initially formed  
284 micro-domains. This suggested a control point during CSD establishment  
285 where a neighboring signal is required to progress from the string-of-pearls  
286 stage and commit to formation of a CS. We had to exclude that isolating  
287 endodermal cells from their neighbors by ablation might cause stresses  
288 that influence overall endodermal differentiation and not just a  
289 destabilization of CASP recruitment to the membrane. We therefore used a  
290 CASP1 transcriptional reporter, driving a nuclear fluorescent protein. Upon  
291 ablation of all surrounding endodermal cells a similar CASP promoter  
292 activity compared to non-affected cells was observed, indicating that  
293 progress of differentiation *per se* was not halted in the isolated cell (Fig.  
294 S3A). To rule out possible general effects on secretion or localization of  
295 plasma membrane proteins, we then ablated cells in double marker lines  
296 expressing CASP1-GFP and the generic SYP122-3xmCherry plasma  
297 membrane marker, both under the control of the CASP1 promoter. Again,  
298 this clearly established that isolated cells still express from the CASP1  
299 promoter. Moreover, they accumulate SYP122 on all cell sides, in contrast  
300 to CASP1, which accumulates only at plasma membrane domains facing a  
301 living neighbor (Fig. 3D).

302 We then thought to confirm our findings by means that do not involve  
303 destruction of neighboring cells. To do so we generated inducible

304 complementation lines for MYB36, a key transcription factor of  
305 endodermal differentiation (Lieberman et al. 2015; Kamiya et al. 2015).  
306 *myb36* loss-of-function mutants are unable to activate expression of key  
307 CSD proteins, e.g. CASPs, and consequently lack a CSD. Using very low level  
308 of inducer, we generated sporadic MYB36 activation to enable some, but  
309 not all cells to start differentiation and initiate CS formation. Expectedly,  
310 we observed a sporadic, patchy expression pattern of CSD domain marker  
311 CASP1-GFP upon induction, with some samples displaying expression in  
312 isolated, single cells, while others showed cell groups with a near complete  
313 CSD network (Fig. 3E). Confirming our ablation results, we found that  
314 isolated cells were able to deposit CASP1-GFP in typical micro-domains but  
315 were incapable of forming a stable and continuous CSD, similar to what  
316 was observed using cell ablation (Fig. 3E, left). If two adjacent cells started  
317 to deposit CASPs, we observed an increase in GFP signal only in the domain  
318 between these cells, followed by fusion of the initial micro-domains into a  
319 continuous strip (Fig. 3E, right). The domains not facing a CASP1 expressing  
320 neighbor did not progress beyond a string-of-pearls stage and eventually  
321 lost the CASP1-GFP signal (Fig. 3F, S3B). We conclude that wildtype plants  
322 appear to require signals from neighbors to form stable microdomains and  
323 commit to a CS. *lotr1* is currently the only known mutant that can form  
324 functional microdomains in the absence of neighbors. We therefore asked  
325 whether *lotr1* might be able to fuse micro-domains at the side facing the  
326 dead neighbor into continuous strips. Yet, when we ablated cells in *lotr1*,  
327 we observed a similar disappearance of the central CSD facing the ablated  
328 cell (Fig S3C). One explanation could be that LOTR1 function is redundant  
329 for destabilization of unpaired domains in the correct, central position, but  
330 is required at surfaces facing non-endodermal neighbors. Indeed, we did  
331 observe formation of stable, *lotr1*-typical patches on the side facing its  
332 dead neighbor, although they occurred in membranes facing living  
333 pericycle cells.

334 *LOTR1 defines a novel pathway controlling CASP domain positioning*

335 While no other knock-out mutant resembles *lotr1*, overstimulation of the  
336 SCHENGEN (SGN) pathway by external application of CIF2 peptide, leads to  
337 ectopic formation of CASP domains somehow resembling the phenotype of  
338 *lotr1*. The CIF2 peptide is perceived by the Leucine-rich repeat receptor  
339 kinase SGN3 (also called GSO1), a key receptor controlling a novel  
340 apoplastic barrier surveillance pathway (Doblas et al. 2017; Nakayama et  
341 al. 2017). A complete absence of SGN3 activity in knock-out mutants leads  
342 to an incomplete fusion of otherwise correctly positioned CASP micro-  
343 domains. In order to test, whether *lotr1* ectopic patches are due to an  
344 overactive SGN pathway, we generated double knockouts of *lotr1* in  
345 combination with *sgn1*, *sgn2* or *sgn3*. Single mutants *sgn1* and *sgn2*  
346 showed sporadic disruptions in their central CSD while *sgn3* displayed  
347 more numerous holes in comparison, agreeing with previously published  
348 data (J Allassimone et al. 2016; Doblas et al. 2017) (Fig. 4A). Double mutants  
349 displayed *lotr1*-typical ectopic deposition of CASP1-GFP, as well as  
350 discontinuities of the central domain. Although discontinuities in the  
351 central CSDs were visible in *lotr1* itself, these occurred mostly at cell  
352 junctions, while *sgn*-typical interruptions were present throughout the  
353 length of the CSD. Both types of disruptions were found in the respective  
354 double mutants. Moreover, no significant difference between the double  
355 and single mutants was observed in blockage of apoplastic tracer PI, a test  
356 for CS functionality (Fig 4C). This clear additivity of phenotypes suggests  
357 that LOTR1 and SGN mutants are involved in separate pathways. It  
358 certainly excludes a model whereby ectopic patch formation of *lotr1* is due  
359 to an overactive SGN pathway. We also tested a possible connection to  
360 ESB1. Again, *lotr1 esb1* double mutants displayed a addition of parental  
361 phenotypes with an *esb1*-typical string-of-pearl-stage central CSD and  
362 *lotr1*-typical ectopic CASP deposits and showed no enhanced apoplastic  
363 barrier phenotype, indicating that LOTR1 also acts independently of *esb1* in  
364 CS domain formation.

365 The model of SGN3-CIF1/2 integrity signaling predicts enhanced  
366 lignification of endodermal cell corners and an early onset of suberization



367 whenever the diffusion barrier is broken in such a way that CIF peptides  
368 cannot be restricted anymore. The previously described enhanced suberin  
369 phenotype in *lotr1* is consistent with such a barrier-defect induced  
370 activation of the SGN pathway, due to its large corner gaps in the CS  
371 domain. The previously reported large gaps in lignification of CSs (Li et al.,  
372 2017), fit the discontinuous CSDs in this mutant. Presence of KMnO<sub>4</sub>-  
373 stained lignin throughout the endodermal cell corners found in some  
374 samples during our ultra-structural analysis (Fig. S1E) resembled SGN3-  
375 induced ectopic lignification. To unambiguously demonstrate ectopic lignin  
376 deposition outside the CASP-labelled domain, we employed a novel  
377 clearing protocol that enables co-observation of fluorescent markers, e.g.  
378 CASP1-GFP, and lignin specific stains, such as Basic Fuchsin (Ursache et al.  
379 2018) (Fig. S4A). As described, in addition to the central CS, lignin  
380 accumulates at ectopic CASP1-deposits in *lotr1* (FIG 4B). However, cell  
381 corner lignification not associated with CASP1 domains was observed at  
382 sites of gaps in the CSD, but not at places where the CSD was continuous.  
383 This nicely supports the recently proposed model in which SGN3-  
384 stimulation can induce local lignification with subcellular precision (Fujita  
385 et al. 2020). Consistently, enhanced lignin deposition in cell corners was  
386 not present in the *lotr1 sgn3* double mutant, confirming that this ectopic  
387 lignin is caused by activation of the barrier surveillance mechanism. *lotr1*-  
388 typical patches, by contrast, were still lignified in the double mutant,  
389 supporting the concept of two separate pathways controlling lignin  
390 deposition in the endodermis: A developmental lignification pathway  
391 building up CS-type lignin and the SGN3-mediated ectopic lignin deposition  
392 that compensates in case of barrier defects. Exogenous application of CIF2  
393 peptide further demonstrated that the SGN3-pathway is functional in *lotr1*  
394 (Fig. 4D). In the presence of CIF2, both genotypes formed ectopic lignin at  
395 cell corners.

#### 396 *LOTR1* is broadly expressed in the root

397 Due to a lack of available expression data in public databases (*LOTR1* was  
398 not included on the ATH1 microarrays), it was crucial to generate a

399 reporter line. We therefore placed a nuclear-localized tdTomato under the  
400 control of a 3 kb *LOTR1* promoter fragment. We observed strong promoter  
401 activity in the root meristem in nearly all tissue layers and cells, including  
402 QC and columella, with the highest expression found in the stele (FIG 4E).  
403 Very low expression was found in the epidermis and ground cell lineage,  
404 with promoter activity visible in cortex/endodermal initials and their  
405 endodermis daughter cells, but not in the cortex daughter. In older  
406 meristematic cells, *LOTR1* expression further reduced in epidermis and  
407 endodermis, whereas stele cells continued to show strong promoter  
408 activity. This pattern continued past the elongation zone, where stele  
409 expression was still strong with some residual signals found in epidermal  
410 and endodermal cells. Inside the stele itself, *LOTR1* was specifically absent  
411 in xylem precursor and xylem-adjacent procambium cells, whereas  
412 pericycle, phloem precursor and phloem-adjacent procambium cells  
413 displayed strong expression (FIG 4E). Recently published single-cell RNA  
414 sequencing results showed strong expression of *LOTR1* in clusters  
415 corresponding to phloem, stele, xylem, and root cap cells, confirming our  
416 promoter activity analysis (Ryu et al. 2019; Denyer et al. 2019). Despite this  
417 broad expression pattern, *lotr1* mutants displayed only phenotypes related  
418 to endodermal differentiation, i.e. ectopic CASP deposition and disrupted  
419 CSDs causing compensatory lignification and suberin deposition, which  
420 themselves are likely responsible for the previously observed delay in  
421 lateral root development and low-calcium-sensitivity phenotype (Li et al.  
422 2017). Consequently, if the expression pattern points to a much broader  
423 function for *LOTR1* outside of endodermal differentiation, these additional  
424 functions are probably redundantly fulfilled some of the many homologs of  
425 *LOTR1* (Fig. 4F).

426 *LOTR1* codes for a putative cell wall protein with a predicted signal peptide,  
427 a putative auto-inhibitory domain (Neprosin-AP), and a Neprosin domain,  
428 recently identified as novel proline protease domain in an enzyme found in  
429 the digestive fluids of pitcher plants (Rey et al. 2016; Schrader et al. 2017).  
430 We found 42 other proteins in the Arabidopsis proteome with a domain

431 structure like LOTR1, i.e. having both Neprosin-AP and Neprosin domains,  
432 although subsequent phylogenetic analysis showed considerable variation  
433 among the family members. Average identity towards LOTR1 among this  
434 “HOMOLOGS-OF-LOTR1” (HOLO) family was only 38 % ( $\pm$  12) with the three  
435 closest homologs standing out at  $\sim$  70 % (Table S1). Phylogenetic clustering  
436 identified 5 subgroups (A:E) with instances of gene-duplication events  
437 visible especially in group C, where 8 homologs were found in consecutive  
438 loci on chromosome 4, highlighting the variable nature of this family (Fig.  
439 4F). Nevertheless, putative orthologs of LOTR1 can be identified in both  
440 mono- and eudicot species, indicating that, although some family members  
441 seem to evolve rapidly, LOTR1 has a deep conservation of function,  
442 expected for a regulator of CS formation.

443 While 34 of the putative homologs showed predicted signal peptides for  
444 apoplastic localization, we also found 5 proteins in the family predicted to  
445 have a single N-terminal transmembrane domain with their active domain  
446 outside in the apoplast (Fig. 4F, Table S1). Thus, the HOLO family are  
447 interesting candidates for proteolytically processing membrane or cell wall  
448 proteins relevant for domain establishment. Single-cell RNAseq expression  
449 profiles of *LOTR1*'s four closest homologs partially overlapped in cell  
450 clusters for QC/meristem (At1g23340, At1g70550, At5g56530), root cap  
451 (At1g10750, At1g70550), phloem (At1g70550, At5g56530), and xylem  
452 (At1g10750, At23340, At1g70550, At56530) (Ryu et al. 2019), explaining  
453 the lack of any meristematic phenotypes in *lotr1*. However, while 8  
454 separate mutants with this unique patchy phenotype identified in the  
455 *LORD-OF-THE-RINGS* screen all turned out to be alleles of *LOTR1*, none of  
456 its homologs were found, indicating they likely have separate roles.

457 Mature and active Neprosin has been reported to consist only of its  
458 functional domain (PF03080) (Rey et al. 2016), presumably undergoing  
459 processing during or after secretion. However, only full-length protein was  
460 found in functional, full-length complementation lines (Fig. S4C), suggesting  
461 that LOTR1 might retain its putative auto-inhibitory Neprosin-AP domain.  
462 Expression of artificially truncated versions of LOTR1 consisting of only its

463 Neprosin domain or only its putatively auto-inhibitory Neprosin-AP domain  
464 resulted in extensive intracellular labelling and absence of  
465 complementation (Fig. S4D), supporting that LOTR1 does not undergo post-  
466 processing.

467 As many of the Neprosin-containing proteins are still annotated as putative  
468 carboxyterminal proteases, we investigated potential homologies towards  
469 such enzymes. Database searches identified *E.coli* protein mepS, a cell wall  
470 protease required for cell wall expansion, as a potential candidate.  
471 Although displaying only 20 % identity to LOTR1's Neprosin domain,  
472 structural comparison revealed that three crucial amino acids in the  
473 catalytic center of mepS, one cysteine and two histidines, are present in  
474 LOTR1, its three closest homologs, as well as Neprosin itself (Fig. S5A,B).  
475 Expression of a full-length LOTR1 version with putative active-site residues  
476 C255 and C260 mutated to alanine showed apoplastic localization similar  
477 to unmutated LOTR1, but was unable to complement the *lotr1* phenotype  
478 (Fig. S4D). This suggests an important functional role for these amino acids  
479 in LOTR1 and supports a protease function for this enzyme class in  
480 *Arabidopsis*.

481 *Tissue specific complementation indicates a non-cell autonomous action for*  
482 *LOTR1.*

483 The strong expression pattern of LOTR1 suggests a function in the inner  
484 stele tissues and a non-autonomous action of LOTR1 on endodermal  
485 differentiation. With a potential protease function an action on the equally  
486 stele-expressed CIF peptides was conceivable, but inconsistent with our  
487 genetic analysis. In order to establish the site of LOTR1 action, we  
488 generated LOTR1 fusion proteins and were able to complement the loss-of-  
489 function phenotype with LOTR1 N-terminal (behind the signal peptide), but  
490 not C-terminal fusion proteins, indicating that a free C-terminus is  
491 important for its functionality (Fig. 5A). Interestingly, the *lotr1-8* allele,  
492 where a late STOP-codon truncated the protein by just 16 aa leads to a  
493 knock-out phenotype, further suggesting an important role of the c-  
494 terminal extremity. In agreement with the promoter activity, fluorescence  
Page | 16

495 of the fusion construct was mainly visible in the apoplastic space between  
496 stele cells, with outer tissues showing very low levels of accumulation (Fig.  
497 5A).

498 To determine if the very low expression observed in the endodermis is  
499 nonetheless responsible for LOTR1 function, we generated lines driving  
500 LOTR1 expression from stele-, endodermal-, or cortex-specific promoters in  
501 the *lotr1* mutant background. We found continuous CSDs and lack of  
502 patches only when expressed from the stele specific SHORTROOT (SHR)  
503 and CIF2 promoters, but not from endodermal SCR, CASP1, and ELTP, nor  
504 cortex specific C1 promoters (Fig. 5C). Covering early, intermediate, and  
505 late endodermal development, the lack of complementation by  
506 endodermal promoters demonstrated that LOTR1 was not acting in the  
507 endodermis to fulfil its role in CSD formation. Peculiarly, expression of the  
508 same construct under the ubiquitous 35S CaMV promoter did also not  
509 seem to complement the underlying *lotr1* phenotype. Several scenarios  
510 could explain this finding: LOTR1 function could require exclusive  
511 expression in the stele, although its native promoter showed some weak  
512 outer tissue activity. Alternatively, over- and misexpression of the  
513 construct might lead to the same patchy *lotr1* phenotype, but through  
514 dominant interference. We therefore created an inducible  
515 complementation construct, where the 3kb *LOTR1* promoter fragment was  
516 fused to the estrogen-inducible artificial XVE transcription factor, with a  
517 subsequent minimal 35S promoter driving expression of the native gene  
518 (Zuo, Niu, and Chua 2000; Siligato et al. 2016). This allows control of  
519 expression strength of the target genes. Upon induction of this construct in  
520 the *lotr1* background, we observed a full complementation of the  
521 phenotype even under strong induction conditions (Fig. 5B). Control plants  
522 without inducer showed the typical phenotype. Thus, expression strength  
523 was not causing the seeming absence of complementation in the 35S lines,  
524 leaving mis- expression in outer tissues as a probable cause for the  
525 observed phenotype.

526 We therefore tested whether ubiquitous expression via 35S would lead to  
527 a dominant-interference phenotype in wildtype. We outcrossed all  
528 generated lines to wildtype CASP1-GFP plants to test for genetic  
529 dominance of the transformed constructs. Previously complementing  
530 constructs LOTR1::LOTR1, SHR::LOTR1, and CIF2::LOTR1 continued to  
531 display a wild-type CSDs and no occurrence of *lotr1* typical patches in the  
532 F1 generation (Fig. 5C). Expectedly, wild-type phenotypes were also  
533 observed for the non-complementing, endodermis-specific SCR and CASP1  
534 driven lines. Remarkably, not only expression driven by 35S, but also from  
535 cortex-specific C1 and endodermal/cortex-expressing ELTP promoters  
536 caused ectopic CASP1-GFP patches like those observed in  
537 uncomplemented *lotr1* in the F1 progeny. We confirmed this dominant  
538 phenotype in the following segregating F2 generations, where all plants  
539 harboring ELTP, C1, or 35S constructs showed patch formation. Only 7/37  
540 (ELTP), 9/42 (C1), and 8/45 (35S) plants displayed wildtype like continuous  
541 CSDs and no patches in the respective F2 populations. Since the dominant  
542 phenotype was not easily distinguishable from the normal *lotr1* loss-of-  
543 function phenotype, our observed ratios (18.9 %, 21.4 %, 17.7 %) matched  
544 the expected 3/16 (18.75 %) Mendelian segregation ratio for a wildtype  
545 phenotype (non *lotr1*-homozygous, plus absence of dominant transgene).  
546 Apoplastic barrier functionality tests in these lines confirmed our  
547 observations (Fig. 5D).

548

## 549 **Discussion**

550 Establishment of a functional apoplastic barrier relies on the correctly  
551 localized deposition of lignin at the median position between endodermal  
552 cells (Naseer et al. 2012; Geldner 2013). Although many components  
553 involved in this process have been identified in the last decade, we still  
554 poorly understand the mechanism by which these cells achieve the precise  
555 formation of Casparian Strips in such a way that a single, thin, continuous  
556 ring of lignin is formed in between endodermal cells. In our current work,  
557 we provide new insights into this mechanism by demonstrating strict

558 coordination of CASP deposition in membranes of adjacent endodermal  
559 cells. Independent of any known CS mutant, this coordination pathway  
560 appears to allow a local initial pairing of forming CASP micro-domains,  
561 across the cell wall of neighboring endodermal cells, which promotes their  
562 stabilization and eventual fusion. This results in the necessity for having a  
563 functional, differentiating endodermal cell neighbors in order to form a  
564 continuous CS. Without a neighboring cell in the same developmental  
565 state, wild-type endodermal cells abort CS development after the initial  
566 formation of CASP microdomains, which eventually disappear. In our  
567 current understanding, CASPs are initially secreted in a non-localized  
568 fashion (Roppolo et al. 2011), yet rapidly form aligned CASP micro domains.  
569 This is initiated by a specific exocyst complex, defined by subunit EXO70A1,  
570 whose accumulation at the site of the future CS precedes CASP  
571 accumulation and is necessary for their targeted secretion to this domain  
572 (Kalmbach et al. 2017). Accordingly, *exo70a1* mutants display a high  
573 number of non-localized and non-functional, unstable CASP microdomains.  
574 What mechanism could account for the selective stabilization of CASPs in  
575 domains facing intact neighbors of the same differentiation state, but not  
576 towards dead, undifferentiated cells or cells of a different cellular identity?  
577 One explanation would postulate the existence of a stabilizing short-range  
578 signal, produced by CASPs domain that can only act *in trans*, not *in cis*.  
579 However, such an exclusive *in trans* action is difficult to conceive with  
580 small, released molecules able to diffuse across the cell wall space. It would  
581 be much easier to conceive with filaments, reaching across the cell walls  
582 between domains, but there is no evidence for the existence of such  
583 filament-like structures. Alternatively, a cumulative threshold for a short-  
584 range, stabilizing signal produced by the microdomains can be postulated,  
585 that could only be reached when both cells produce it. However, such a  
586 model would require a very fine-tuned thresholding. Although a promising  
587 candidate for a factor involved in this coordination process, our detailed  
588 analysis of the *lotr1* mutant demonstrates that it does not affect the  
589 coordination of the properly localized micro-domains between cells, nor  
590 does it allow for their formation without neighbors. Nevertheless, absence

591 of LOTR1 activity clearly allows for formation of non-paired, stable, and  
592 fully functional microdomains, oriented towards non-endodermal  
593 neighbors. Therefore, it is most likely responsible for inhibiting sporadic  
594 micro-domain formation throughout the endodermal membrane when  
595 CASPs are starting to focalize from their ubiquitous distribution in the  
596 plasma membrane into aligned micro-domains. The peculiar formation of  
597 Casparian half-strips in *lotr1*, further indicates that lignin deposition into  
598 the CS cell wall is separately performed by both contributing cells, which  
599 would make a tight coordination of neighboring CASP domains all the more  
600 critical for achieving a fully sealed cell wall space. Restricted mostly to the  
601 stele in mature regions of the root, we provide evidence that this putative  
602 cell wall protease might act on a target originating outside of its own  
603 expression profile. *lotr1* could only be complemented using stele-specific  
604 promoters and neither endodermal, cortex nor ubiquitous expression leads  
605 to complementation. Importantly we discovered that wildtype plants  
606 displayed a dominant *lotr1*-like phenotype with ectopic patches, disrupted  
607 CSDs, and a corresponding delay in PI block when LOTR1 was mis-  
608 expressed in the cortex. How could ectopic expression of a putative cell  
609 wall protease in the cortex interfere with the action of the same protease  
610 in its wild-type expression domain in the stele? The most parsimonious  
611 explanation we can conceive is that a LOTR1 substrate is produced in the  
612 outer cortical tissues and has to diffuse into the stele for activation by  
613 stele-expressed LOTR1 (Fig. 6). Expression of LOTR1 in the cortex would  
614 lead to a premature activation of its substrate in the cortex and not allow it  
615 to reach the stele. It would thus deplete the endogenous LOTR1 of its  
616 substrate and cause the observed dominant loss-of-function phenotype.  
617 This explanation thus draws a “reverse” SGN3/CIF pathway model where a  
618 cortex-specific substrate passes across the endodermal cell layer to be  
619 activated by a stele-specific enzyme complex, destabilizing CASPs and  
620 preventing domain formation at ectopic positions.

621

## 622 **Acknowledgments**



623 We wish to thank the Central Imaging Facility (CIF) and the Electron  
624 Microscopy Facility (EMF) of the University of Lausanne for their technical  
625 expertise. We thank Baohai Li and Takehiro Kamiya (Tokyo University) for  
626 initial discussions on the project and exchange of material. We also thank  
627 Hiroko Uchida and Marie Barberon for their graphical work. This work was  
628 supported by an ERC Consolidator Grant (GA-N°: 616228—ENDOFUN) and  
629 two SNSF grants (CRSII3\_136278 and 31003A\_156261) to N.G., and a  
630 Federation of European Biochemical Sciences Postdoctoral Long-Term  
631 Fellowship to P.M..

632 **Author contributions**

633 AK, PM, LK, and NG conceived and designed the project. AK, PM, and DDB  
634 performed experiments and AK and PM performed image quantification.  
635 AK and NG wrote the manuscript and all authors revised the manuscript.

636

637 **Declaration of Interests**

638 The authors declare that they have no conflict of interest.

639 **Figure legends**

640 **Fig. 1: Ectopic domain formation in *lotr1*.**

641 A Schematic representation of endodermal maturation with stages of  
642 Casparian Strip (CS) development (green). Elongated endodermal cells  
643 focalize CASP1-GFP into aligned micro-domains which are subsequently  
644 fused into a continuous ring around each endodermal cells.

645 B CASP1-GFP localization in wildtype and *lotr1* with focus on patch  
646 localization. Images depict maximum intensity projections of z-stack  
647 images. 3D reconstruction image depicts region indicated in *lotr1* overview  
648 image, section view images are annotated by yellow (top) and blue  
649 (bottom) arrows. Overview images scale bars: 20  $\mu\text{m}$ ; 3D reconstruction &  
650 section views scale bars: 10  $\mu\text{m}$ .

651 C 3D schematic for visualization of median endodermal cell section with  
652 annotated cell faces.

653 D TEM section of *lotr1* obtained at 2 mm from root tip. Overview of section  
654 with focus on regular CS and adjacent ectopic patch. Closeup indicated by  
655 dashed black line in overview image; en = endodermis, pe = pericycle, co =  
656 cortex, scale bars = 2  $\mu\text{m}$ .

657 E Consecutive TEM sections at 2 mm from root tip, with and without  
658  $\text{KMnO}_4$  staining, position indicated in (D). Dark deposits indicate electron-  
659 dense  $\text{MnO}_2$  precipitation caused by reaction with lignin. Note that in the  
660 case of ectopic patches, the staining is restricted to the endodermal side of  
661 the cell wall; en = endodermis, pe = pericycle, interspaced white line  
662 depicts extend of CS-like cell wall morphology, scale bar = 1  $\mu\text{m}$ .

663 F Localization of enzymes necessary for CS lignification in wildtype Col-0  
664 and *lotr1*, pictures depict cells as seen in (C). Cellulosic cell walls are stained  
665 with Calcofluor White and depicted in white in overlay images, scale bar =  
666 10  $\mu\text{m}$ .

667

668 **Fig. 2: CASP deposition is coordinated between neighboring endodermal**  
669 **cells.**

670 A Double membrane phenotype visible with CASP1::CASP1-GFP during  
671 string-of-pearls stage of CS development, scale bars depict 10  $\mu\text{m}$ . Red and  
672 grey arrows indicate separate membranes measured in (B).

673 B Comparison of GFP intensity between adjacent membranes indicated in  
674 (A). Pixel intensity was measured along each membrane and relative GFP  
675 intensity was adjusted to mean intensity of each membrane. Correlation of

676 original intensities (R-squared) was determined by fitting of a linear model  
677 with indicated probability of fit (p-value).

678 C Localization of CSD marker CASP1-GFP in comparison to cell wall protein  
679 ESB1-mCherry at early and mature CSs, scale bar depicts 5  $\mu\text{m}$ .

680 D,E Double membrane phenotype of CASP1-GFP before and after ablation  
681 of one adjacent endodermal cell in early (D) and late (E) CSs. Cell walls (red)  
682 are stained with Propidium iodide (PI), yellow arrows indicate intensity  
683 profiles measured in F-I; asterisks indicate ablated cell, scale bars = 5  $\mu\text{m}$ .

684 F-I Quantification of CASP1-GFP and PI intensity before and after cell  
685 ablation. Intensity was quantified in a 7-pixel wide line indicated in (D) and  
686 (E).

687

688 **Fig. 3: Endodermal neighbors are required for proper CSD establishment**

689 A Endodermal cell ablation leads to instability of the CSD in membranes  
690 facing dead cells. Endodermal cells were ablated 3-5 cells prior to onset of  
691 CASP1-GFP (white) expression and followed over indicated time spans. First  
692 image depicts overview after ablation with cells outlined with PI; # depicts  
693 remaining live endodermal cell, dashed yellow line depicts cell outlines of  
694 ablated cells, arrow indicates onset of CASP expression, dashed green and  
695 red rectangles indicate quantification areas shown in (B), scale bar = 20  
696  $\mu\text{m}$ .

697 B Quantification of GFP fluorescence over time in membranes facing live  
698 (green) and dead (red) adjacent endodermal cells. Intensity depicted in  
699 relation to maximum total GFP intensity.

700 C Ablation of all adjacent endodermal cells prevents fusion of CSDs.  
701 Endodermal neighbors were ablated at timepoint 0 and CASP1-GFP  
702 expression (white) followed over time in remaining cell (#), PI (red)  
703 highlighted cell outlines and confirmed destruction of cells; yellow arrow  
704 indicates initial CASP microdomains, scale bar = 50  $\mu\text{m}$ .

705 D CASP instability in membranes facing ablated cells is independent from  
706 CASP expression. Cells ablated 3-5 cells prior to onset of CASP expression,  
707 cell outline depicted with dashed yellow line, arrow indicates stable CASP  
708 formation, scale bar = 100  $\mu\text{m}$ .

709 E CASP fusion occurs only if both neighboring cells reach expression  
710 threshold. Endodermal differentiation was induced via 0.5  $\mu\text{M}$   $\beta$ -estradiol  
711 and CASP1-GFP expression followed over the next 12 h. Yellow arrows  
712 indicate CASP deposits in the membrane, dashed green and red rectangles  
713 indicate areas for quantification shown in (F).

714 F Quantification of GFP fluorescence over time in membranes reaching  
715 local stability threshold (green) and those below the threshold (red).

716

717 **Fig. 4: LOTR1 restricts CSD establishment through independent pathway.**

718 A CASP1-GFP fluorescence of known CS mutants in wildtype and *lotr1*  
719 background. Yellow arrows indicate parental CS mutant phenotype while  
720 blue arrows highlight *lotr1* specific phenotypes; scale bar = 20  $\mu$ m.

721 B Enhanced lignification in *lotr1* is SCHENGEN-dependent. Ectopic lignin  
722 (magenta) accumulates in *lotr1* at disruptions of the CASP1-GFP (green)  
723 marked CSD. Lignification of the central domain and ectopic patches is  
724 unaffected by disruption of *SGN3*, scale bar = 20  $\mu$ m.

725 C Apoplastic barrier phenotypes of *lotr1* double mutants. Formation of  
726 apoplastic barrier was determined by penetrance of apoplastic tracer PI to  
727 the stele; n = 10, significance determined by one-way ANOVA and separate  
728 groups identified with Tukey-Kramer test.

729 D SCHENGEN-pathway is unaffected in *lotr1*. Wildtype and *lotr1* seedlings  
730 were treated for 24 h with 100  $\mu$ M synthetic CIF2 peptide and lignin  
731 accumulation (magenta) outside the regular CSD domain (green) analysed.  
732 Cell walls were stained with Calcofluor White, yellow arrows indicate  
733 ectopic lignin accumulation, scale bar = 5  $\mu$ m.

734 E LOTR1 expression indicates additional roles. Promoter activity highlighted  
735 by tdTomato fluorescence in 5 day old seedlings; cells outlined by  
736 Propidium iodide (white); mid-view regions depicted below highlighted by  
737 continuous rectangles (a,b) and section views indicated by dash-dotted  
738 lines (c,d), inlay shows colour profile of *LOTR1* expression intensity. a  
739 Single-plane section through root meristem region, arrow indicates cortex-  
740 daughter cell. b Single-plane section after cell elongation, arrows indicate  
741 expression in endodermis (top arrow) and epidermis (bottom arrow). c  
742 Maximum-intensity projection of section view of z-stack through meristem  
743 region indicated in top picture. d Maximum-intensity projection of section  
744 view of z-stack through mature region indicated in top picture; \* denotes  
745 endodermal cell lineage, scale bars: *top*: 100  $\mu$ m; *a,b*: 20  $\mu$ m; *c,d*: 50  $\mu$ m.

746 F Phylogenetic analysis of *HOMOLOGS-OF-LOTR1* (HOLO) family in  
747 *Arabidopsis thaliana*. Homologs of LOTR1 in *A.thaliana* were identified and  
748 grouped into five subfamilies by phylogenetic distance, LOTR1 (At5g50150)  
749 highlighted in red, underlined genes have predicted N-terminal  
750 transmembrane domains.

751 **Fig. 5: Stele-specific LOTR1 restricts CSD establishment through a**  
752 **cortex-expressed, mobile target.**

753 A Complementation of *lotr1* phenotype. N-terminal fusion construct  
754 expressed under native *LOTR1* promoter complements ectopic CSD  
755 phenotype. Scale bars: *left* 100  $\mu$ m, *section views* 20  $\mu$ m.

756 B Overexpression of *LOTR1* in wild-type and *lotr1* backgrounds does not  
757 affect complementation. CASP1-GFP phenotype of seedlings grown for 5  
758 days on control or 5  $\mu$ M  $\beta$ -estradiol; scale bar: 20  $\mu$ m.

759 C Mis-expression of LOTR1 in cortical cells causes dominant loss-of-  
760 function phenotypes. CASP1-GFP phenotypes of seedlings expressing  
761 LOTR1-complementation construct used in (A) under indicated promoters.  
762 Activity of used promoter indicated in schematics below; blue arrows  
763 indicate *lotr1*-like phenotypes; EP = epidermis, CO = cortex, EN =  
764 endodermis, ST = stele; scale bars = 20  $\mu$ m.

765 D Apoplastic barrier phenotypes of tissue specific complementation lines in  
766 wildtype (white) and *lotr1* (grey) background. Cells after onset of  
767 elongation counted until penetrance of PI was blocked. n = 10, significance  
768 determined via one-way ANOVA and independent groups identified via  
769 Tukey-Kramer post-hoc test.

770 **Fig. 6: Speculative model of LOTR1 function**

771 **Wild-type:** LOTR1 is a predicted protease (*scissors*), experimentally  
772 determined to be expressed in the stele and to localize in the cell wall. We  
773 speculate that LOTR1 cleaves a cortex-derived substrate (*grey, dark-red*  
774 *coffee bean, inactive*), activating it in the stele (*red half-bean, active*). This  
775 substrate then inhibits ectopic CASP-domain formation (*green*) at the stele-  
776 facing endodermal surface by unknown means. **lotr1 mutant:** Absence of  
777 LOTR1 would not allow activation of the ectopic CASP-domain inhibitor in  
778 the endodermal, stele-facing apoplast, leading to the observed formation  
779 of ectopic, stable CASP-domain predominantly at the stele-facing side of  
780 the endodermal surface. **LOTR1 cortex mis-expression:** This model explains  
781 the observation that cortical mis-expression of LOTR1 dominantly  
782 interferes with wild-type LOTR1 action, if it would precociously cleave and  
783 activate the LOTR1 substrate, not allowing it to reach the stele to be  
784 activated by wild-type LOTR1. This would lead to the observed, similar  
785 phenotype than the *lotr1* knock-out.

786

787

## 788 **STAR Methods**

### 789 *Plant material and growth conditions*

790 All experiments were performed in the *Arabidopsis thaliana* Columbia-0  
791 ecotype. T-DNA insertion lines obtained from NASC: *lotr1-10*  
792 (SALK\_051707) (Li et al. 2017), *sgn3-3* (SALK\_043282) (Pfister et al. 2014),  
793 *sgn1-2* (SALK\_055095C) (J Alassimone et al. 2016), *sgn2-2* (SALK\_009847)  
794 (Doblas et al. 2017); *myb36-2* (GK- 543B11) (Kamiya et al. 2015), *esb1-1*  
795 was kindly shared by Prof. David Salt's group (Hosmani et al. 2013), and the  
796 *lotr1-1* allele was identified in the *LOTR*-screen (Li et al. 2017). Inducible  
797 pUBQ10>>XVE::MYB36 were obtained from the TRANSPLANTA collection  
798 (N2102512 and N2102513) and crossed to CASP1::CASP1-GFP. If not  
799 otherwise stated, plants were grown as follows: Seeds were surface  
800 sterilized and sown on half-strength Murashige-Skoog medium (Duchefa)  
801 solidified with 0.8 % plant agar (Duchefa). After stratification for 2 days at 4  
802 °C, seeds were germinated in growth chambers with long-day conditions  
803 (16 h light/8 h dark) and temperature cycling between 22 °C/19 °C  
804 (day/night). 5 days after germination, seedlings were directly analysed or  
805 cleared and stained with ClearSee as described (Ursache et al. 2018). For  
806 long-term imaging, agar blocks with seedlings were cut and transferred  
807 into microscope chamber slides (Marhavý and Benková 2015; Marhavý et  
808 al. 2016) and equal volume of double-concentrated  $\beta$ -estradiol added  
809 before imaging.

### 810 *Plasmid construction*

811 A 3 kb promoter fragment of *LOTR1* was generated by 5'-  
812 aacaggtctcgacctcttctatctgtttgtacctaaagt-3' and 5'-  
813 aacaggtctcatgttaactagagaatgtacggcttgttt-3' and cloned via Eco31I-  
814 restriction sites into GreenGate entry module vector pGGA000  
815 (Lampropoulos et al. 2013). Genomic fragment of *LOTR1* coding sequence  
816 was amplified with 5'-  
817 aacaggtctcaggctcagtgTCAGCTATTCATCTTAAAAACCAAACCTTCA and 5'-  
818 aacaggtctcaCTGAAGGACACCTTGGGTTCCG-3' and cloned into pGGC000.  
819 mScarlet-I was amplified from pmScarlet-I\_C1 (Bindels et al. 2016)

820 obtained from Addgene and secretion peptide was added by tandem PCR  
821 amplification with 5'-  
822 gctctttccctctatctctctgcccaatccagccactagtATGGTGAGCAAGGGCGAG-3' (FW1)  
823 and 5'-  
824 aacaGGTCTCaAACAatgaaagccttcacactcgcctctcttcttagctctttccctctatctctctg-3'  
825 (FW2) and 5'-aacaGGTCTCaAGCCCTTGACAGCTCGTCCATGC-3' (RV) and  
826 cloned via Eco31I sites into pGGB000. Final destination clones were  
827 obtained by subsequent GoldenGate reaction with pGreenII based  
828 pGGZ003 and transformed into *Arabidopsis* using floral dip.

### 829 *Confocal imaging*

830 Imaging was performed on Leica SP8 or Zeiss LSM880 microscopes,  
831 excitation and emission as follows (excitation, detection): Calcofluor White  
832 (405 nm, 425 – 475 nm), GFP (488nm, 500 – 550 nm),  
833 mCherry/tdTomato/mScarlet-I (563 nm, 580 – 650 nm), PI (563 nm, 580 –  
834 650 nm), basic Fuchsin (563 nm, 580 – 650 nm).

### 835 *PI assay*

836 PI was performed as described in Lee et al. 2013 with following changes:  
837 Seedlings were incubated in 10 µg/ml PI dissolved in water for 5 min and  
838 imaged immediately afterwards. Number of endodermal cells determined  
839 after onset of elongation (defined as first endodermal cell with length to  
840 width ratio of at least 2, i.e. at least twice as long than wide).

### 841 *Transmission electron microscopy (TEM)*

842 5-day-old *Arabidopsis* seedlings were fixed in glutaraldehyde solution  
843 (EMS, Hatfield, PA) 2.5% in 100 mM phosphate buffer (pH 7.4) for 1 hour at  
844 room temperature. Then, they were post-fixed in osmium tetroxide 1%  
845 (EMS) with 1.5% of potassium ferrocyanide (Sigma, St. Louis, MO) in  
846 phosphate buffer for 1 hour at room temperature. Following that, the  
847 plants were rinsed twice in distilled water and dehydrated in ethanol  
848 solution (Sigma) at gradient concentrations (30% 40 min; 50% 40 min; 70%  
849 40 min; two times (100% 1 hour). This was followed by infiltration in Spurr  
850 resin (EMS) at gradient concentrations (Spurr 33% in ethanol, 4 hours;



851 Spurr 66% in ethanol, 4 hours; Spurr two times (100% 8 hours) and finally  
852 polymerized for 48 hours at 60°C in an oven. Ultrathin sections 50 nm thick  
853 were cut transversally at 2mm ± 0.2 mm from the root tip, on a Leica  
854 Ultracut (Leica Mikrosysteme GmbH, Vienna, Austria) and two consecutive  
855 sections were picked up on a nickel slot grid 2X1 mm (EMS) coated with a  
856 polystyrene film (Sigma).

#### 857 *Lignin staining with permanganate potassium (KMnO<sub>4</sub>) using TEM*

858 Visualization of lignin deposition around Casparian strip was done using  
859 permanganate potassium (KMnO<sub>4</sub>) staining (Hepler, Fosket, and Newcomb  
860 1970). The first section was imaged without any post-staining. Then the  
861 sections were post-stained using 1% of KMnO<sub>4</sub> in H<sub>2</sub>O (Sigma, St Louis, MO,  
862 US) for 45min and rinsed several times with H<sub>2</sub>O. Then the second section  
863 of the grid was imaged. Micrographs were taken with a transmission  
864 electron microscope FEI CM100 (FEI, Eindhoven, The Netherlands) at an  
865 acceleration voltage of 80kV and 11000X magnifications (pixel size of  
866 1.851nm), with a TVIPS TemCamF416 digital camera (TVIPS GmbH,  
867 Gauting, Germany) using the software EM-MENU 4.0 (TVIPS GmbH,  
868 Gauting, Germany). Panoramic were aligned with the software IMOD  
869 (Kremer, Mastronarde, and McIntosh 1996).

#### 870 *Cell ablation*

871 Endodermal cells were ablated using a MaiTai-SpectraPhysics laser at 800  
872 nm integrated into a Zeiss LSM880 microscope. A ROI outlining the cells to  
873 ablate was used and cells were ablated with 2 % power and 0.8 µs pixel  
874 dwell time. Cell destruction was confirmed using transmitted light and PI  
875 staining.

#### 876 *Western blot*

877 Roots of 5-day old seedlings grown on ½ MS medium were cut and  
878 weighted before shock-freezing in liquid nitrogen. Samples were then  
879 homogenized using TissueLyser II (Qiagen). Proteins were then denatured  
880 by addition of 3x (v/w) 1x NuPAGE LDS sample buffer + 50 mM DTT  
881 (Invitrogen, NP0007) and heating for 5 min at 70 °C. Cell debris was

882 removed by centrifugation at 1'000 *g* for 5 min before separation of  
883 proteins on pre-cast 12 % Bis-Tris SDS-PAGE gels (iD PAGE, Eurogentec).  
884 After electrophoresis, proteins were transferred onto PVDF membrane  
885 using Pierce FastBlotter G2 semi-dry blotting. Membranes were then  
886 blocked (5 % skim milk in TBS) for 1 h before incubation with anti-RFP  
887 antibody (1:1000, Chromotek 6G6) overnight at 4 °C. After washing the  
888 membrane three times with 1x TBS + 0.1 % Tween (TBS-T), blot incubated  
889 for 2 h at room temperature with anti-mouse-HRP antibody (1:5000).  
890 Finally, after washing blot three times with TBS-T, HRP activity was  
891 detected using SuperSignal West Femto Kit (Thermo Scientific) and GE  
892 ImageQuant LAS 500.

### 893 *Phylogenetic analysis*

894 Homologs of LOTR1 were identified by searching the *Arabidopsis thaliana*  
895 proteome for proteins containing both Neprosin-AP (PF14365) and  
896 Neprosin domains (PF03080). Sequence similarity was compared using  
897 MUSCLE (EMBL-EBI, Madeira et al. 2019). Phylogenetic analysis was done  
898 using the NGPhylogeny.fr online-tool with PhyML+SMS settings. Final tree  
899 was assembled and annotated with iTOL online tool (Letunic and Bork  
900 2019). Conserved residues were identified using pre-aligned sequences and  
901 the online-weblogo tool from the University of Berkeley  
902 (<https://weblogo.berkeley.edu/logo.cgi>) (Crooks et al. 2004).

### 903 *Statistical analysis*

904 Statistical analysis was done in R software (R Core Team, 2013)  
905 (<https://www.r-project.org/>). For multiple group comparisons, one-way  
906 ANOVA was performed, and significantly different groups identified with  
907 Tukey-Kramer post-hoc test.

908

909 **Fig. S1: Establishment of ectopic domain formations in *lotr1*.**

910 A Localization of ectopic deposition of CASP1-GFP (green). Section view of  
911 z-stack through roots 5-10 cells after onset of protoxylem differentiation,  
912 cell wall stained with Calcofluor White (white) and crops shown on top  
913 outlined in overview pictures below (dashed yellow line); scale bar = 50  
914  $\mu\text{m}$ , c = cortex, e = endodermis, p = pericycle.

915 B Quantification of ectopic CASP1-GFP patches. Number and position of  
916 ectopic patches were determined per cell and depicted as ratio of patches  
917 facing pericycle cells vs total patch number, maximum of 3 cells counted  
918 per seedling,  $n_{\text{total}} = 11$ .

919 C Deposition of CASP1-GFP in *lotr1*. CASP1-GFP fluorescence depicted  
920 throughout CSD formation in *lotr1*; scale bars = 5  $\mu\text{m}$ . Kymograph image at  
921 bottom illustrates fluorescence over time in line indicated above, individual  
922 patch formation visible as independent pyramid-like structures (yellow  
923 arrows).

924 D TEM section of wildtype at 2 mm. Closeup indicated by dashed black line  
925 in overview image, en = endodermis, pe = pericycle, scale bars = 2  $\mu\text{m}$ .

926 E Consecutive TEM sections at 2 mm from root tip, with and without  
927  $\text{KMnO}_4$  staining. Dark deposits indicate electron-dense  $\text{MnO}_2$  precipitation  
928 caused by reaction with lignin; en = endodermis, pe = pericycle, black  
929 arrows indicate CS-like cell wall with attached plasma membranes, white  
930 arrows highlight plasmolyzed membranes detached from the cell wall,  
931 scale bar = 1  $\mu\text{m}$ .

932

933 **Fig. S2: CASP1-GFP membrane coordination.**

934 Double membrane phenotype in CS mutants, scale bars = 5  $\mu\text{m}$ .  $R^2$  value  
935 depicts Spearman rho correlation coefficients of fluorescence of 5 pixel  
936 wide lines following each membrane.

937

938 **Fig. S3: Cell ablation impacts CS establishment.**

939 A CASP1 promoter activity highlighted by nls-GFP (green) after ablation of  
940 all neighboring cells prior to onset of expression, PI (red) outlines cells and  
941 confirmed cell destruction. Scale bar = 50  $\mu\text{m}$ .

942 B Endodermal differentiation was induced via 0.5  $\mu\text{M}$   $\beta$ -estradiol and  
943 CASP1-GFP expression (white) followed over the next 12 h. Red arrows  
944 indicate unstable CASP deposits in the membrane, scale bar = 50  $\mu\text{m}$ .

945 C CSD formation in wildtype and *lotr1*. Single endodermal cells ablated 3-4  
946 cells prior to onset of CASP expression, \* depicts ablated cell, scale bar = 50  
947 um.

948

949 **Fig. S4: Investigation of putative post-translational processing in LOTR1.**

950 A Lignin accumulation (magenta) in wildtype and *sgn3* with CSDs labelled  
951 by CASP1-GFP (green).

952 B Schematic view of LOTR1 with position of identified loss-of-function  
953 alleles indicated.

954 C Processing of LOTR1. Root protein extracts separated via SDS-PAGE and  
955 LOTR1-fragments detected by anti-RFP antibody (Chromotek 6G6). Note  
956 that C-terminal fusion construct LOTR1::LOTR1-mCherry does not  
957 complement the *lotr1* phenotype, but shows processing/degradation  
958 fragments. Both weak (#1) and strong (#2) C-terminal complementation  
959 lines lack processing/degradation fragments.

960 D Complementation analysis of the *lotr1* CASP1-GFP phenotype using  
961 truncated versions consisting of only LOTR1's Neprosin domain (Neprosin),  
962 the putative autoinhibitory Neprosin-AP domain (Neprosin-AP), or full-  
963 length LOTR1 with conserved cysteines C255 and C260 mutated  
964 (LOTR1<sup>C255A,C260A</sup>), scale bars = 50 μm.

965

966 **Fig. S5: Neprosin domain analysis in the HOLO family.**

967 A Conservation of Neprosin domain throughout the HOLO-family, including  
968 LOTR1. Putative catalytic triade amino acids aligning with *E.coli* mepS  
969 marked with red arrows.

970 B Sequence alignment of *E.coli* mepS, Neprosin, LOTR1 and its closest  
971 homologs At1g23340 (HOLO2), At1g70550 (HOLO3), and At1g10750  
972 (HOLO4)

973

974

975 **References**

- 976 Alassimone, J, S Fujita, V G Doblas, M van Dop, M Barberon, L Kalmbach, J E  
977 Vermeer, et al. 2016. “Polarly Localized Kinase SGN1 Is Required for  
978 Casparian Strip Integrity and Positioning.” *Nat Plants* 2: 16113.  
979 <https://doi.org/10.1038/nplants.2016.113>.
- 980 Alassimone, Julien, Sadaf Naseer, and Niko Geldner. 2010. “A  
981 Developmental Framework for Endodermal Differentiation and  
982 Polarity.” *Proc Natl Acad Sci U S A* 107 (11): 5214–19.  
983 <https://doi.org/10.1073/pnas.0910772107>.
- 984 Bao, Zhulatai, Juan Bai, Hongchang Cui, and Chunmei Gong. 2019. “A  
985 Missing Link in Radial Ion Transport: Ion Transporters in the  
986 Endodermis.” *Frontiers in Plant Science* 10 (June): 1–8.  
987 <https://doi.org/10.3389/fpls.2019.00713>.
- 988 Barbosa, Inês Catarina Ramos, Nelson Rojas-Murcia, and Niko Geldner.  
989 2019. “The Casparian Strip—One Ring to Bring Cell Biology to  
990 Lignification?” *Current Opinion in Biotechnology* 56: 121–29.  
991 <https://doi.org/10.1016/j.copbio.2018.10.004>.
- 992 Bindels, Daphne S., Lindsay Haarbosch, Laura Van Weeren, Marten Postma,  
993 Katrin E. Wiese, Marieke Mastop, Sylvain Aumonier, et al. 2016.  
994 “MScarlet: A Bright Monomeric Red Fluorescent Protein for Cellular  
995 Imaging.” *Nature Methods*. <https://doi.org/10.1038/nmeth.4074>.
- 996 Crooks, Gavin E, Gary Hon, John Marc Chandonia, and Steven E. Brenner.  
997 2004. “WebLogo: A Sequence Logo Generator.” *Genome Research* 14  
998 (6): 1188–90. <https://doi.org/10.1101/gr.849004>.
- 999 Denyer, Tom, Xiaoli Ma, Simon Klesen, Emanuele Scacchi, Kay Nieselt, and  
1000 Marja C.P. Timmermans. 2019. “Spatiotemporal Developmental  
1001 Trajectories in the Arabidopsis Root Revealed Using High-Throughput  
1002 Single-Cell RNA Sequencing.” *Developmental Cell* 48 (6): 840-852.e5.  
1003 <https://doi.org/10.1016/j.devcel.2019.02.022>.
- 1004 Doblas, Verónica G, Elwira Smakowska-Luzan, Satoshi Fujita, Julien

- 1005 Alassimone, Marie Barberon, Mathias Madalinski, Youssef Belkhadir,  
1006 and Niko Geldner. 2017. "Root Diffusion Barrier Control by a  
1007 Vasculature-Derived Peptide Binding to the SGN3 Receptor." *Science*  
1008 355 (6322): 280–84. <https://doi.org/10.1126/science.aaj1562>.
- 1009 Enstone, Daryl E., Carol A. Peterson, and Fengshan Ma. 2002. "Root  
1010 Endodermis and Exodermis: Structure, Function, and Responses to the  
1011 Environment." *Journal of Plant Growth Regulation*. Springer.  
1012 <https://doi.org/10.1007/s00344-003-0002-2>.
- 1013 Fujita, Satoshi, Damien De Bellis, Kai H Edel, Philipp Köster, Tonni Grube  
1014 Andersen, Emanuel Schmid-Siebert, Valérie Déneraud Tendon, et al.  
1015 2020. "SCHENGEN Receptor Module Drives Localized ROS Production  
1016 and Lignification in Plant Roots." *The EMBO Journal*, e103894.  
1017 <https://doi.org/10.15252/emboj.2019103894>.
- 1018 Geldner, Niko. 2013. "The Endodermis." *Annual Review of Plant Biology* 64  
1019 (1): 531–58. [https://doi.org/10.1146/annurev-arplant-050312-](https://doi.org/10.1146/annurev-arplant-050312-120050)  
1020 [120050](https://doi.org/10.1146/annurev-arplant-050312-120050).
- 1021 Hepler, Peter K., Donald E. Fosket, and Eldon H. Newcomb. 1970.  
1022 "LIGNIFICATION DURING SECONDARY WALL FORMATION IN COLEUS:  
1023 AN ELECTRON MICROSCOPIC STUDY." *American Journal of Botany* 57  
1024 (1): 85–96. <https://doi.org/10.1002/j.1537-2197.1970.tb09793.x>.
- 1025 Hosmani, P S, T Kamiya, J Danku, S Naseer, N Geldner, M L Guerinot, and D  
1026 E Salt. 2013. "Dirigent Domain-Containing Protein Is Part of the  
1027 Machinery Required for Formation of the Lignin-Based Casparian Strip  
1028 in the Root." *Proc Natl Acad Sci U S A* 110 (35): 14498–503.  
1029 <https://doi.org/10.1073/pnas.1308412110>.
- 1030 Itoh, Masahiko, and Mina J. Bissell. 2003. "The Organization of Tight  
1031 Junctions in Epithelia: Implications for Mammary Gland Biology and  
1032 Breast Tumorigenesis." *Journal of Mammary Gland Biology and*  
1033 *Neoplasia* 8 (4): 449–62.  
1034 <https://doi.org/10.1023/B:JOMG.0000017431.45314.07>.

- 1035 Kalmbach, L, K Hematy, D De Bellis, M Barberon, S Fujita, R Ursache, J  
1036 Daraspe, and N Geldner. 2017. "Transient Cell-Specific EXO70A1  
1037 Activity in the CASP Domain and Casparian Strip Localization." *Nat*  
1038 *Plants* 3: 17058. <https://doi.org/10.1038/nplants.2017.58>.
- 1039 Kamiya, Takehiro, Monica Borghi, Peng Wang, John M. C. Danku, Lothar  
1040 Kalmbach, Prashant S. Hosmani, Sadaf Naseer, Toru Fujiwara, Niko  
1041 Geldner, and David E. Salt. 2015. "The MYB36 Transcription Factor  
1042 Orchestrates Casparian Strip Formation." *Proc Natl Acad Sci U S A* 112  
1043 (33): 10533–38. <https://doi.org/10.1073/pnas.1507691112>.
- 1044 Kremer, James R, David N Mastronarde, and J.Richard McIntosh. 1996.  
1045 "Computer Visualization of Three-Dimensional Image Data Using  
1046 IMOD." *Journal of Structural Biology* 116 (1): 71–76.  
1047 <https://doi.org/10.1006/jsbi.1996.0013>.
- 1048 Lampropoulos, A, Z Sutikovic, C Wenzl, I Maegele, J U Lohmann, and J  
1049 Forner. 2013. "GreenGate---a Novel, Versatile, and Efficient Cloning  
1050 System for Plant Transgenesis." *PLoS One* 8 (12): e83043.  
1051 <https://doi.org/10.1371/journal.pone.0083043>.
- 1052 Lee, Y, M C Rubio, J Alassimone, and N Geldner. 2013. "A Mechanism for  
1053 Localized Lignin Deposition in the Endodermis." *Cell* 153 (2): 402–12.  
1054 <https://doi.org/10.1016/j.cell.2013.02.045>.
- 1055 Letunic, Ivica, and Peer Bork. 2019. "Interactive Tree of Life (ITOL) v4:  
1056 Recent Updates and New Developments." *Nucleic Acids Research*.  
1057 <https://doi.org/10.1093/nar/gkz239>.
- 1058 Li, B, T Kamiya, L Kalmbach, M Yamagami, K Yamaguchi, S Shigenobu, S  
1059 Sawa, et al. 2017. "Role of LOTR1 in Nutrient Transport through  
1060 Organization of Spatial Distribution of Root Endodermal Barriers." *Curr*  
1061 *Biol* 27 (5): 758–65. <https://doi.org/10.1016/j.cub.2017.01.030>.
- 1062 Liberman, L M, E E Sparks, M A Moreno-Risueno, J J Petricka, and P N  
1063 Benfey. 2015. "MYB36 Regulates the Transition from Proliferation to  
1064 Differentiation in the Arabidopsis Root." *Proc Natl Acad Sci U S A* 112

- 1065 (39): 12099–104. <https://doi.org/10.1073/pnas.1515576112>.
- 1066 Ma, Jian Feng, Naoki Yamaji, Namiki Mitani, Kazunori Tamai, Saeko Konishi,  
1067 Toru Fujiwara, Maki Katsuhara, and Masahiro Yano. 2007. “An Efflux  
1068 Transporter of Silicon in Rice.” *Nature*.  
1069 <https://doi.org/10.1038/nature05964>.
- 1070 Madeira, Fábio, Young Mi Park, Joon Lee, Nicola Buso, Tamer Gur, Nandana  
1071 Madhusoodanan, Prasad Basutkar, et al. 2019. “The EMBL-EBI Search  
1072 and Sequence Analysis Tools APIs in 2019.” *Nucleic Acids Research*.  
1073 <https://doi.org/10.1093/nar/gkz268>.
- 1074 Marhavý, Peter, and Eva Benková. 2015. “Real-Time Analysis of Lateral  
1075 Root Organogenesis in Arabidopsis.” *BIO-PROTOCOL* 5 (8).  
1076 <https://doi.org/10.21769/BioProtoc.1446>.
- 1077 Marhavý, Peter, Juan Carlos Montesinos, Anas Abuzeineh, Daniel Van  
1078 Damme, Joop E.M. Vermeer, Jérôme Duclercq, Hana Rakusová, et al.  
1079 2016. “Targeted Cell Elimination Reveals an Auxin-Guided Biphasic  
1080 Mode of Lateral Root Initiation.” *Genes and Development* 30 (4): 471–  
1081 83. <https://doi.org/10.1101/gad.276964.115>.
- 1082 Nakayama, Takuya, Hidefumi Shinohara, Mina Tanaka, Koki Baba, Mari  
1083 Ogawa-Ohnishi, and Yoshikatsu Matsubayashi. 2017. “A Peptide  
1084 Hormone Required for Casparian Strip Diffusion Barrier Formation in  
1085 Arabidopsis Roots.” *Science* 355 (6322): 284–86.  
1086 <https://doi.org/10.1126/science.aai9057>.
- 1087 Naseer, S, Y Lee, C Lapierre, R Franke, C Nawrath, and N Geldner. 2012.  
1088 “Casparian Strip Diffusion Barrier in Arabidopsis Is Made of a Lignin  
1089 Polymer without Suberin.” *Proc Natl Acad Sci U S A* 109 (25): 10101–6.  
1090 <https://doi.org/10.1073/pnas.1205726109>.
- 1091 Pfister, A, M Barberon, J Alassimone, L Kalmbach, Y Lee, J E Vermeer, M  
1092 Yamazaki, et al. 2014. “A Receptor-like Kinase Mutant with Absent  
1093 Endodermal Diffusion Barrier Displays Selective Nutrient Homeostasis  
1094 Defects.” *Elife* 3: e03115. <https://doi.org/10.7554/eLife.03115>.



- 1095 Rajasekaran, Ayyappan K., Minoru Hojo, Tellervo Huima, and Enrique  
1096 Rodriguez-Boulan. 1996. "Catenins and Zonula Occludens-1 Form a  
1097 Complex during Early Stages in the Assembly of Tight Junctions."  
1098 *Journal of Cell Biology* 132 (3): 451–63.  
1099 <https://doi.org/10.1083/jcb.132.3.451>.
- 1100 Rey, M, M Yang, L Lee, Y Zhang, J G Sheff, C W Sensen, H Mrazek, et al.  
1101 2016. "Addressing Proteolytic Efficiency in Enzymatic Degradation  
1102 Therapy for Celiac Disease." *Sci Rep* 6: 30980.  
1103 <https://doi.org/10.1038/srep30980>.
- 1104 Roppolo, Daniele, Bert De Rybel, Valérie Dénervaud Tendon, Alexandre  
1105 Pfister, Julien Alassimone, Joop E. M. Vermeer, Misako Yamazaki,  
1106 York-Dieter Stierhof, Tom Beeckman, and Niko Geldner. 2011. "A  
1107 Novel Protein Family Mediates Casparian Strip Formation in the  
1108 Endodermis." *Nature* 473 (7347): 380–83.  
1109 <https://doi.org/10.1038/nature10070>.
- 1110 Ryu, K H, L Huang, H M Kang, and J Schiefelbein. 2019. "Single-Cell RNA  
1111 Sequencing Resolves Molecular Relationships Among Individual Plant  
1112 Cells." *Plant Physiol* 179 (4): 1444–56.  
1113 <https://doi.org/10.1104/pp.18.01482>.
- 1114 Schrader, C U, L Lee, M Rey, V Sarpe, P Man, S Sharma, V Zabrouskov, B  
1115 Larsen, and D C Schriemer. 2017. "Neprosin, a Selective Prolyl  
1116 Endoprotease for Bottom-up Proteomics and Histone Mapping." *Mol*  
1117 *Cell Proteomics* 16 (6): 1162–71.  
1118 <https://doi.org/10.1074/mcp.M116.066803>.
- 1119 Siligato, R, X Wang, S R Yadav, S Lehesranta, G Ma, R Ursache, I Sevillem, et  
1120 al. 2016. "MultiSite Gateway-Compatible Cell Type-Specific Gene-  
1121 Inducible System for Plants." *Plant Physiol* 170 (2): 627–41.  
1122 <https://doi.org/10.1104/pp.15.01246>.
- 1123 Stein, Barry D., Karen L. Klomparens, and Raymond Hammerschmidt. 1992.  
1124 "Comparison of Bromine and Permanganate as Ultrastructural Stains  
1125 for Lignin in Plants Infected by the Fungus *Colletotrichum*

- 1126           Lagenarium." *Microscopy Research and Technique* 23 (3): 201–6.  
1127           <https://doi.org/10.1002/jemt.1070230302>.
- 1128    Takano, Junpei, Mayuki Tanaka, Atsushi Toyoda, Kyoko Miwa, Koji Kasai,  
1129           Kentarō Fuji, Hitoshi Onouchi, Satoshi Naito, and Toru Fujiwara. 2010.  
1130           "Polar Localization and Degradation of Arabidopsis Boron  
1131           Transporters through Distinct Trafficking Pathways." *Proceedings of*  
1132           *the National Academy of Sciences of the United States of America*.  
1133           <https://doi.org/10.1073/pnas.0910744107>.
- 1134    Ursache, R, T G Andersen, P Marhavy, and N Geldner. 2018. "A Protocol for  
1135           Combining Fluorescent Proteins with Histological Stains for Diverse  
1136           Cell Wall Components." *Plant J* 93 (2): 399–412.  
1137           <https://doi.org/10.1111/tpj.13784>.
- 1138    Yamashita, Daichi, Satoshi Kimura, Masahisa Wada, and Keiji Takabe. 2016.  
1139           "Improved Mäule Color Reaction Provides More Detailed Information  
1140           on Syringyl Lignin Distribution in Hardwood." *Journal of Wood Science*  
1141           62 (2): 131–37. <https://doi.org/10.1007/s10086-016-1536-9>.
- 1142    Zuo, Jianru, Qi-Wen W. Niu, and Nam-Hai H. Chua. 2000. "An Estrogen  
1143           Receptor-Based Transactivator XVE Mediates Highly Inducible Gene  
1144           Expression in Transgenic Plants." *The Plant Journal* 24 (2): 265–73.  
1145           <https://doi.org/10.1046/j.1365-313x.2000.00868.x>.
- 1146

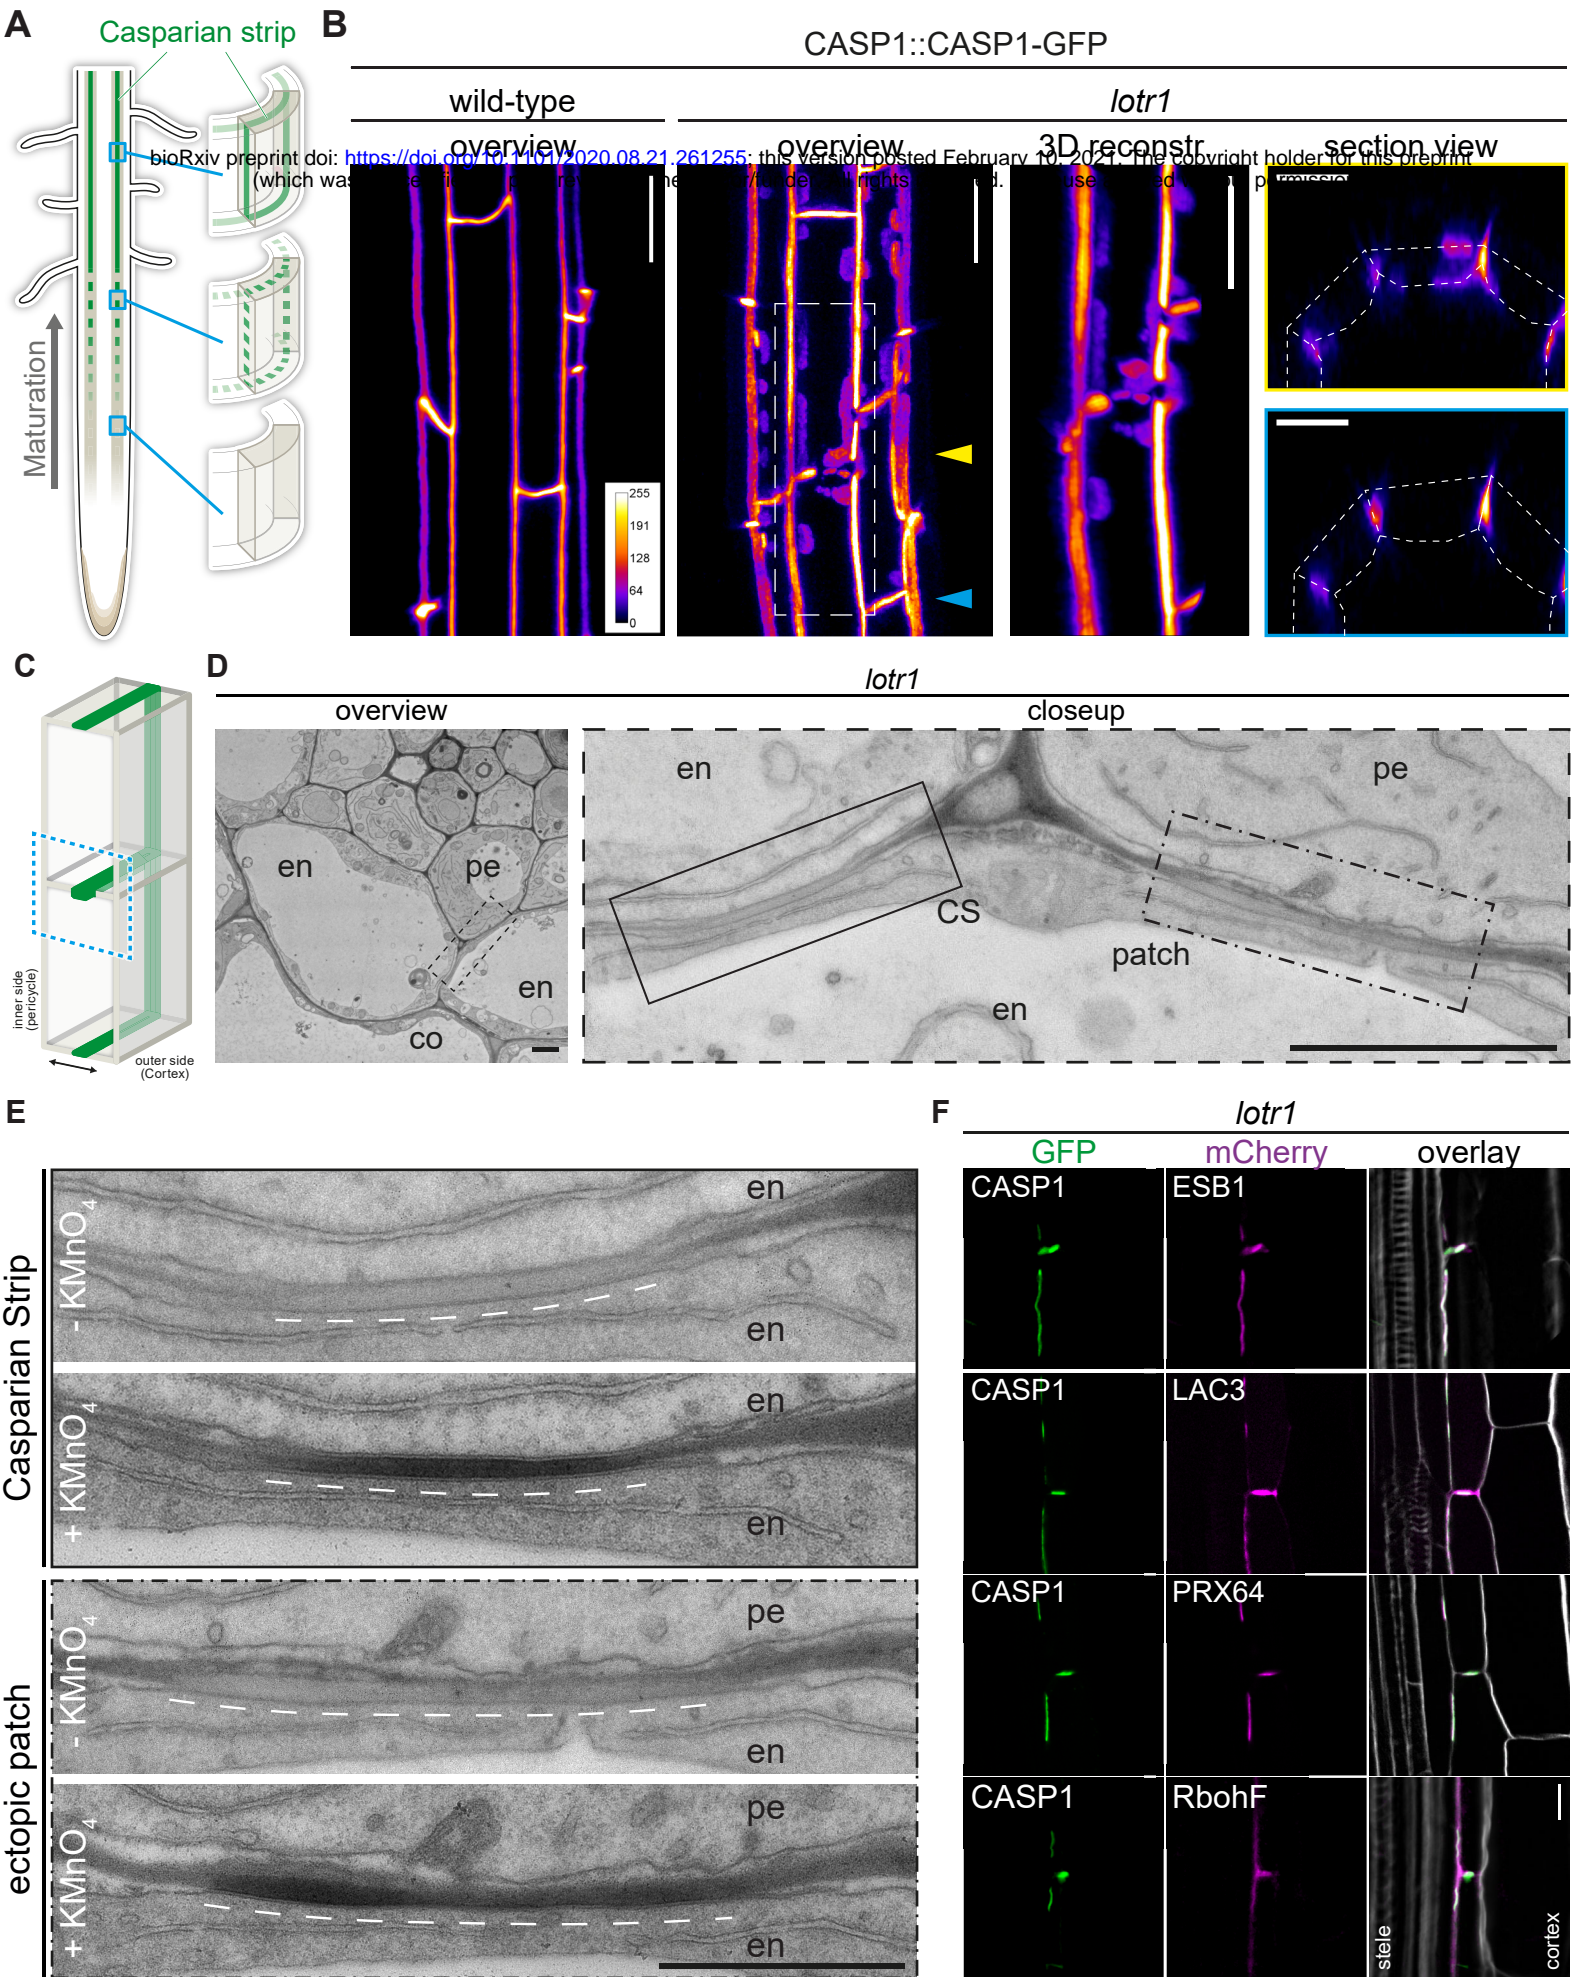

**Fig. 1**



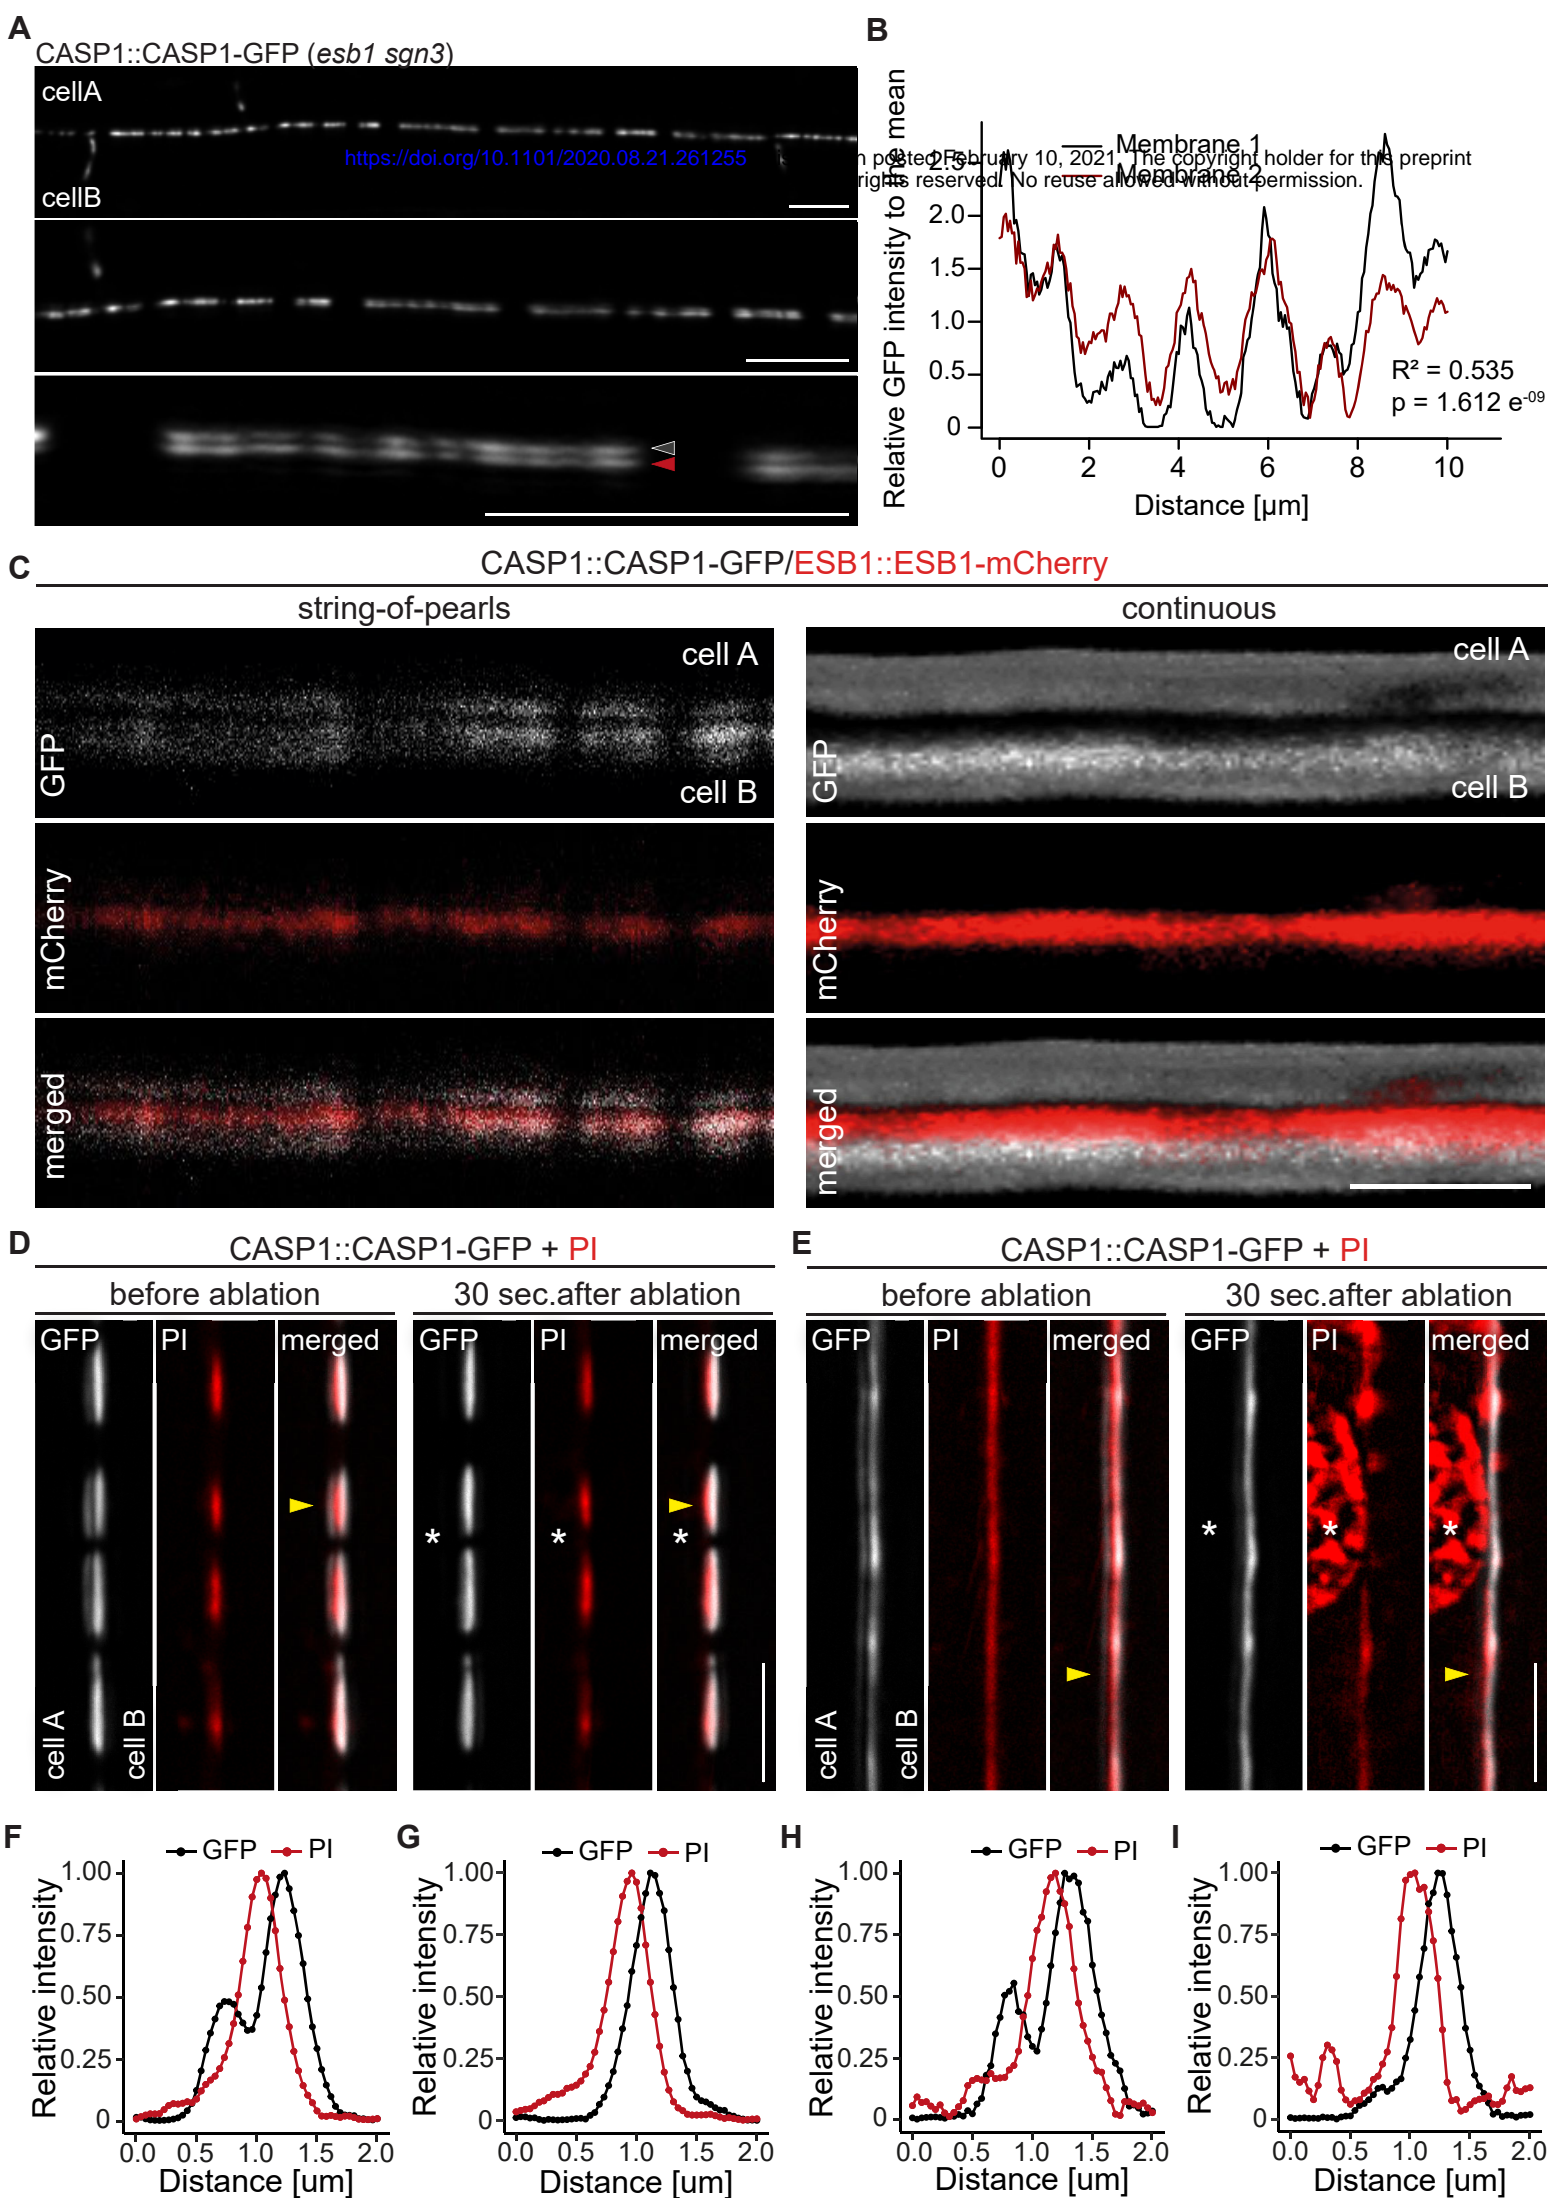

**Fig. 2**

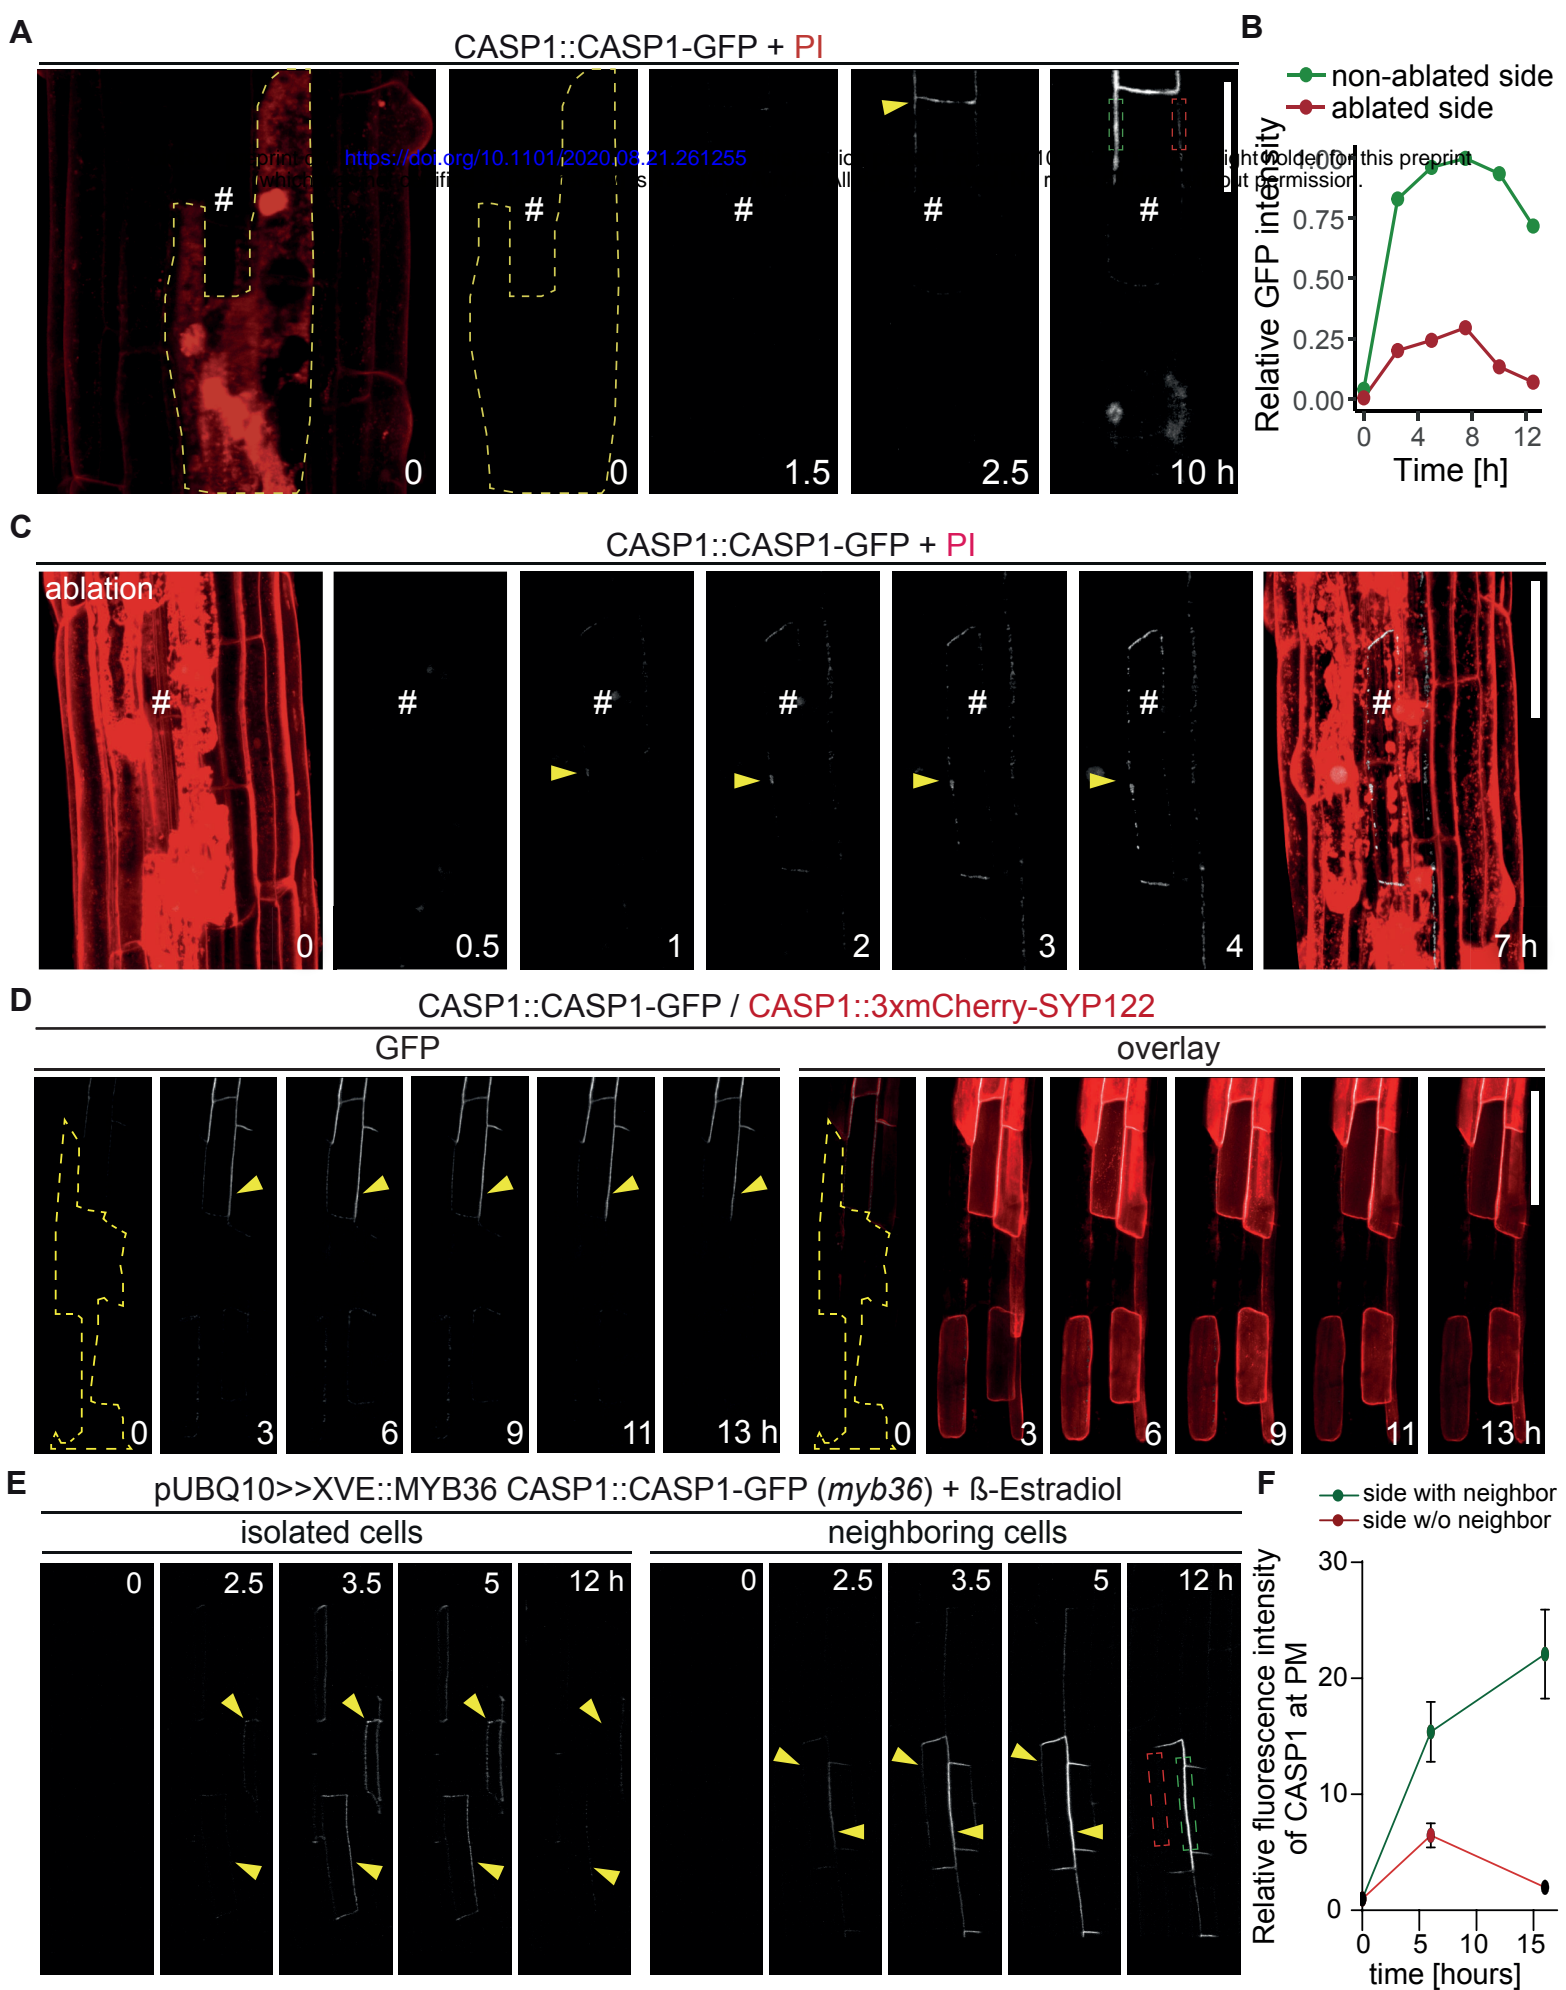

**Fig. 3**



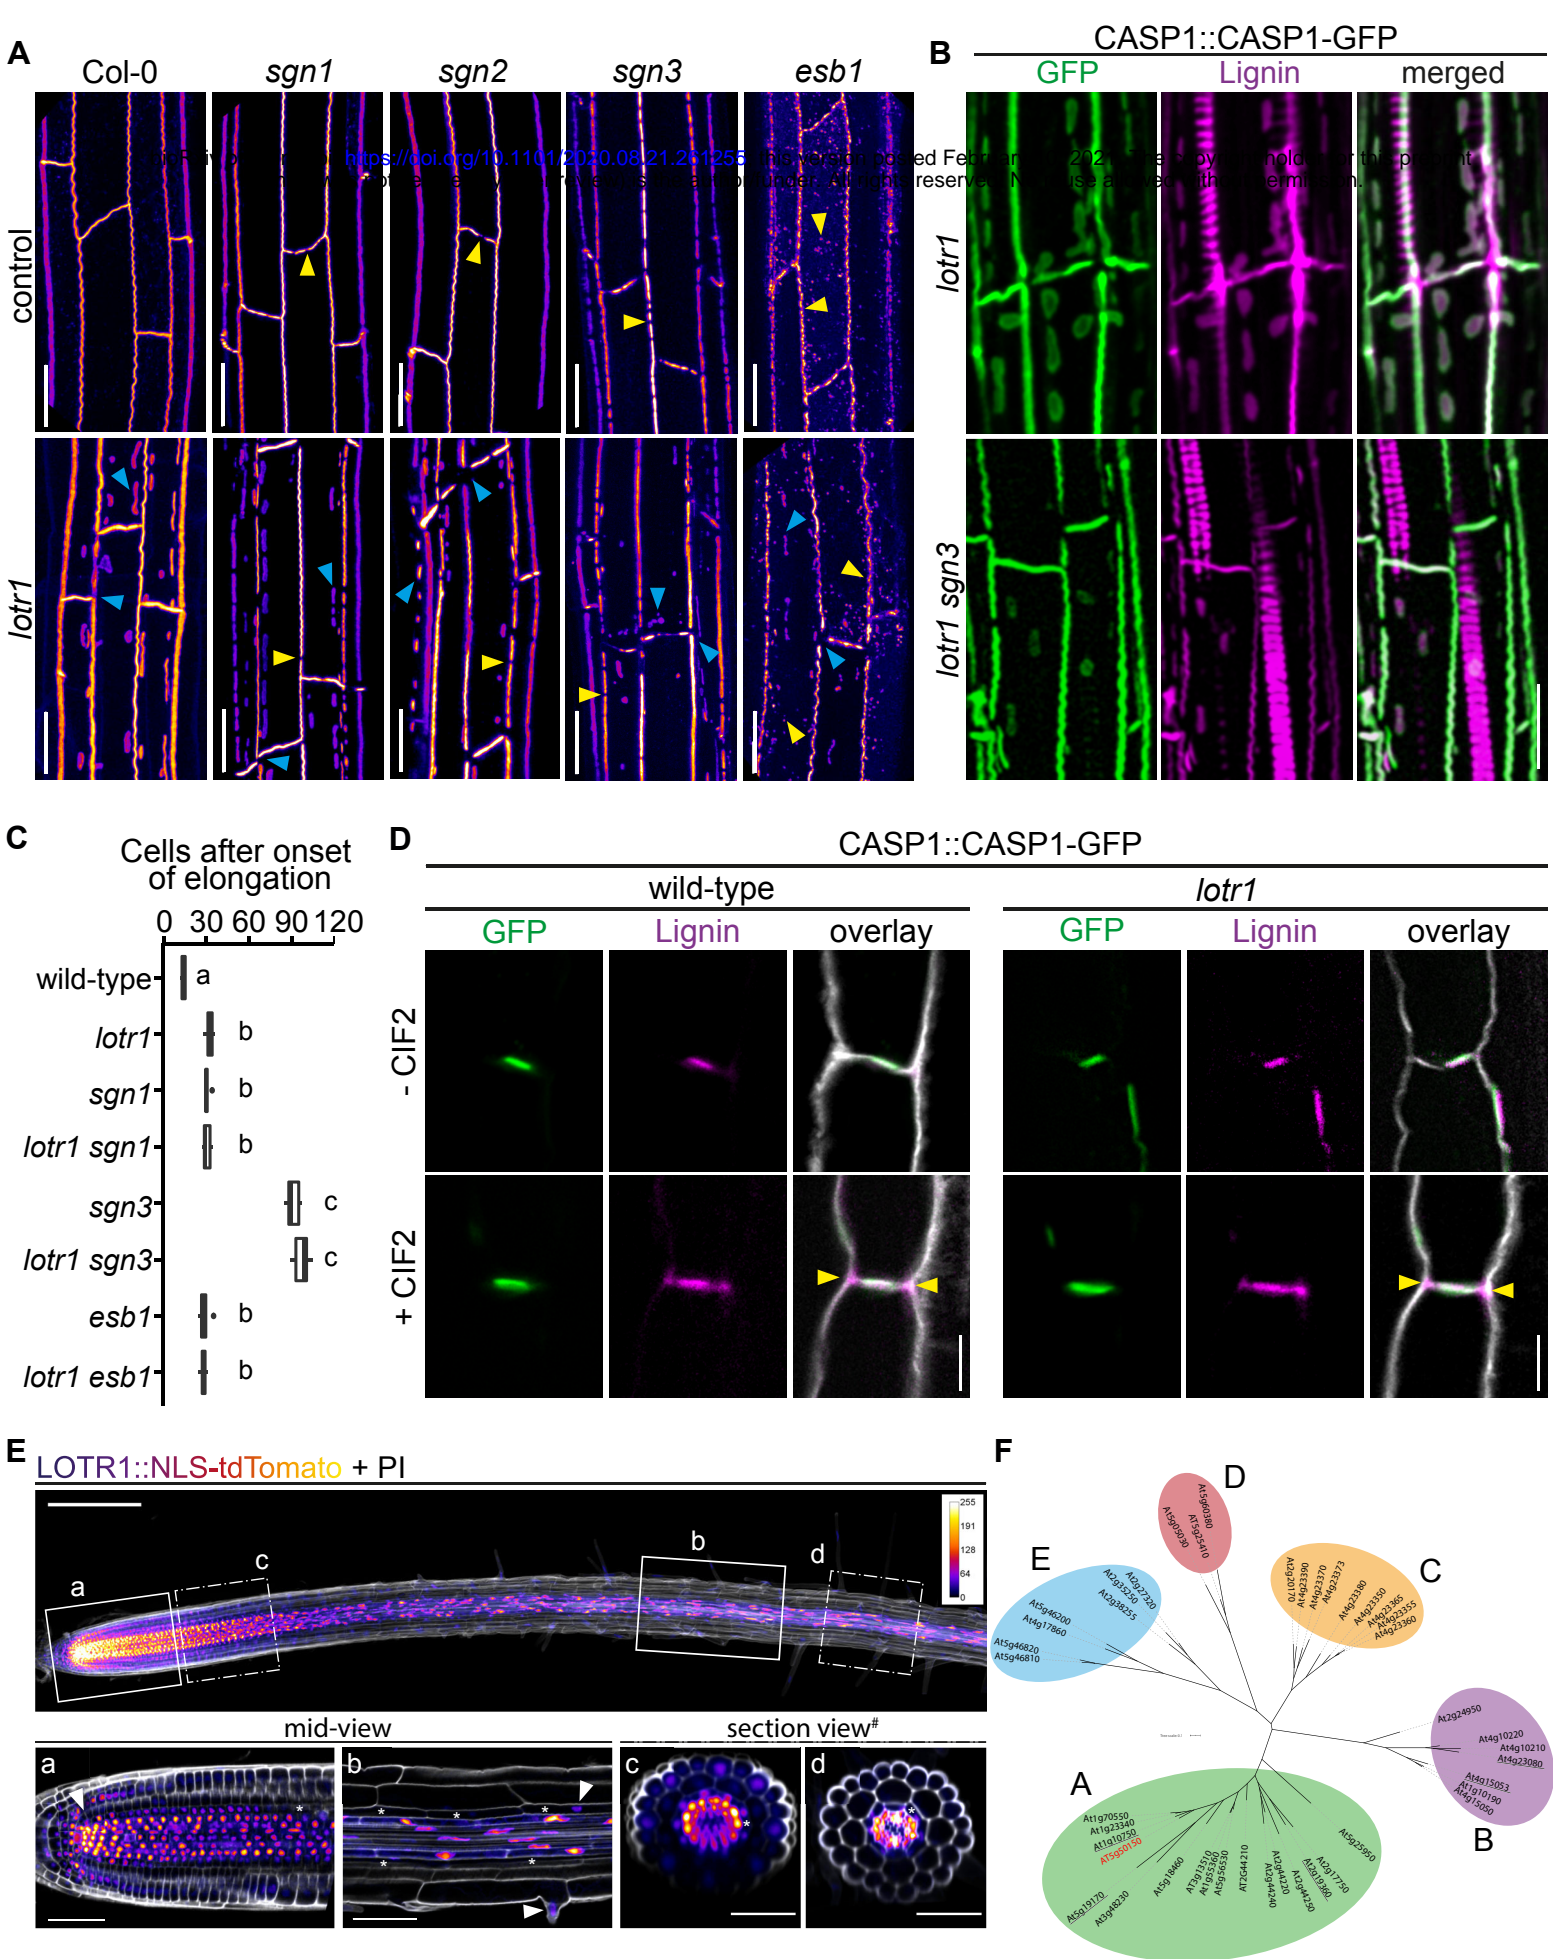

**Fig. 4**

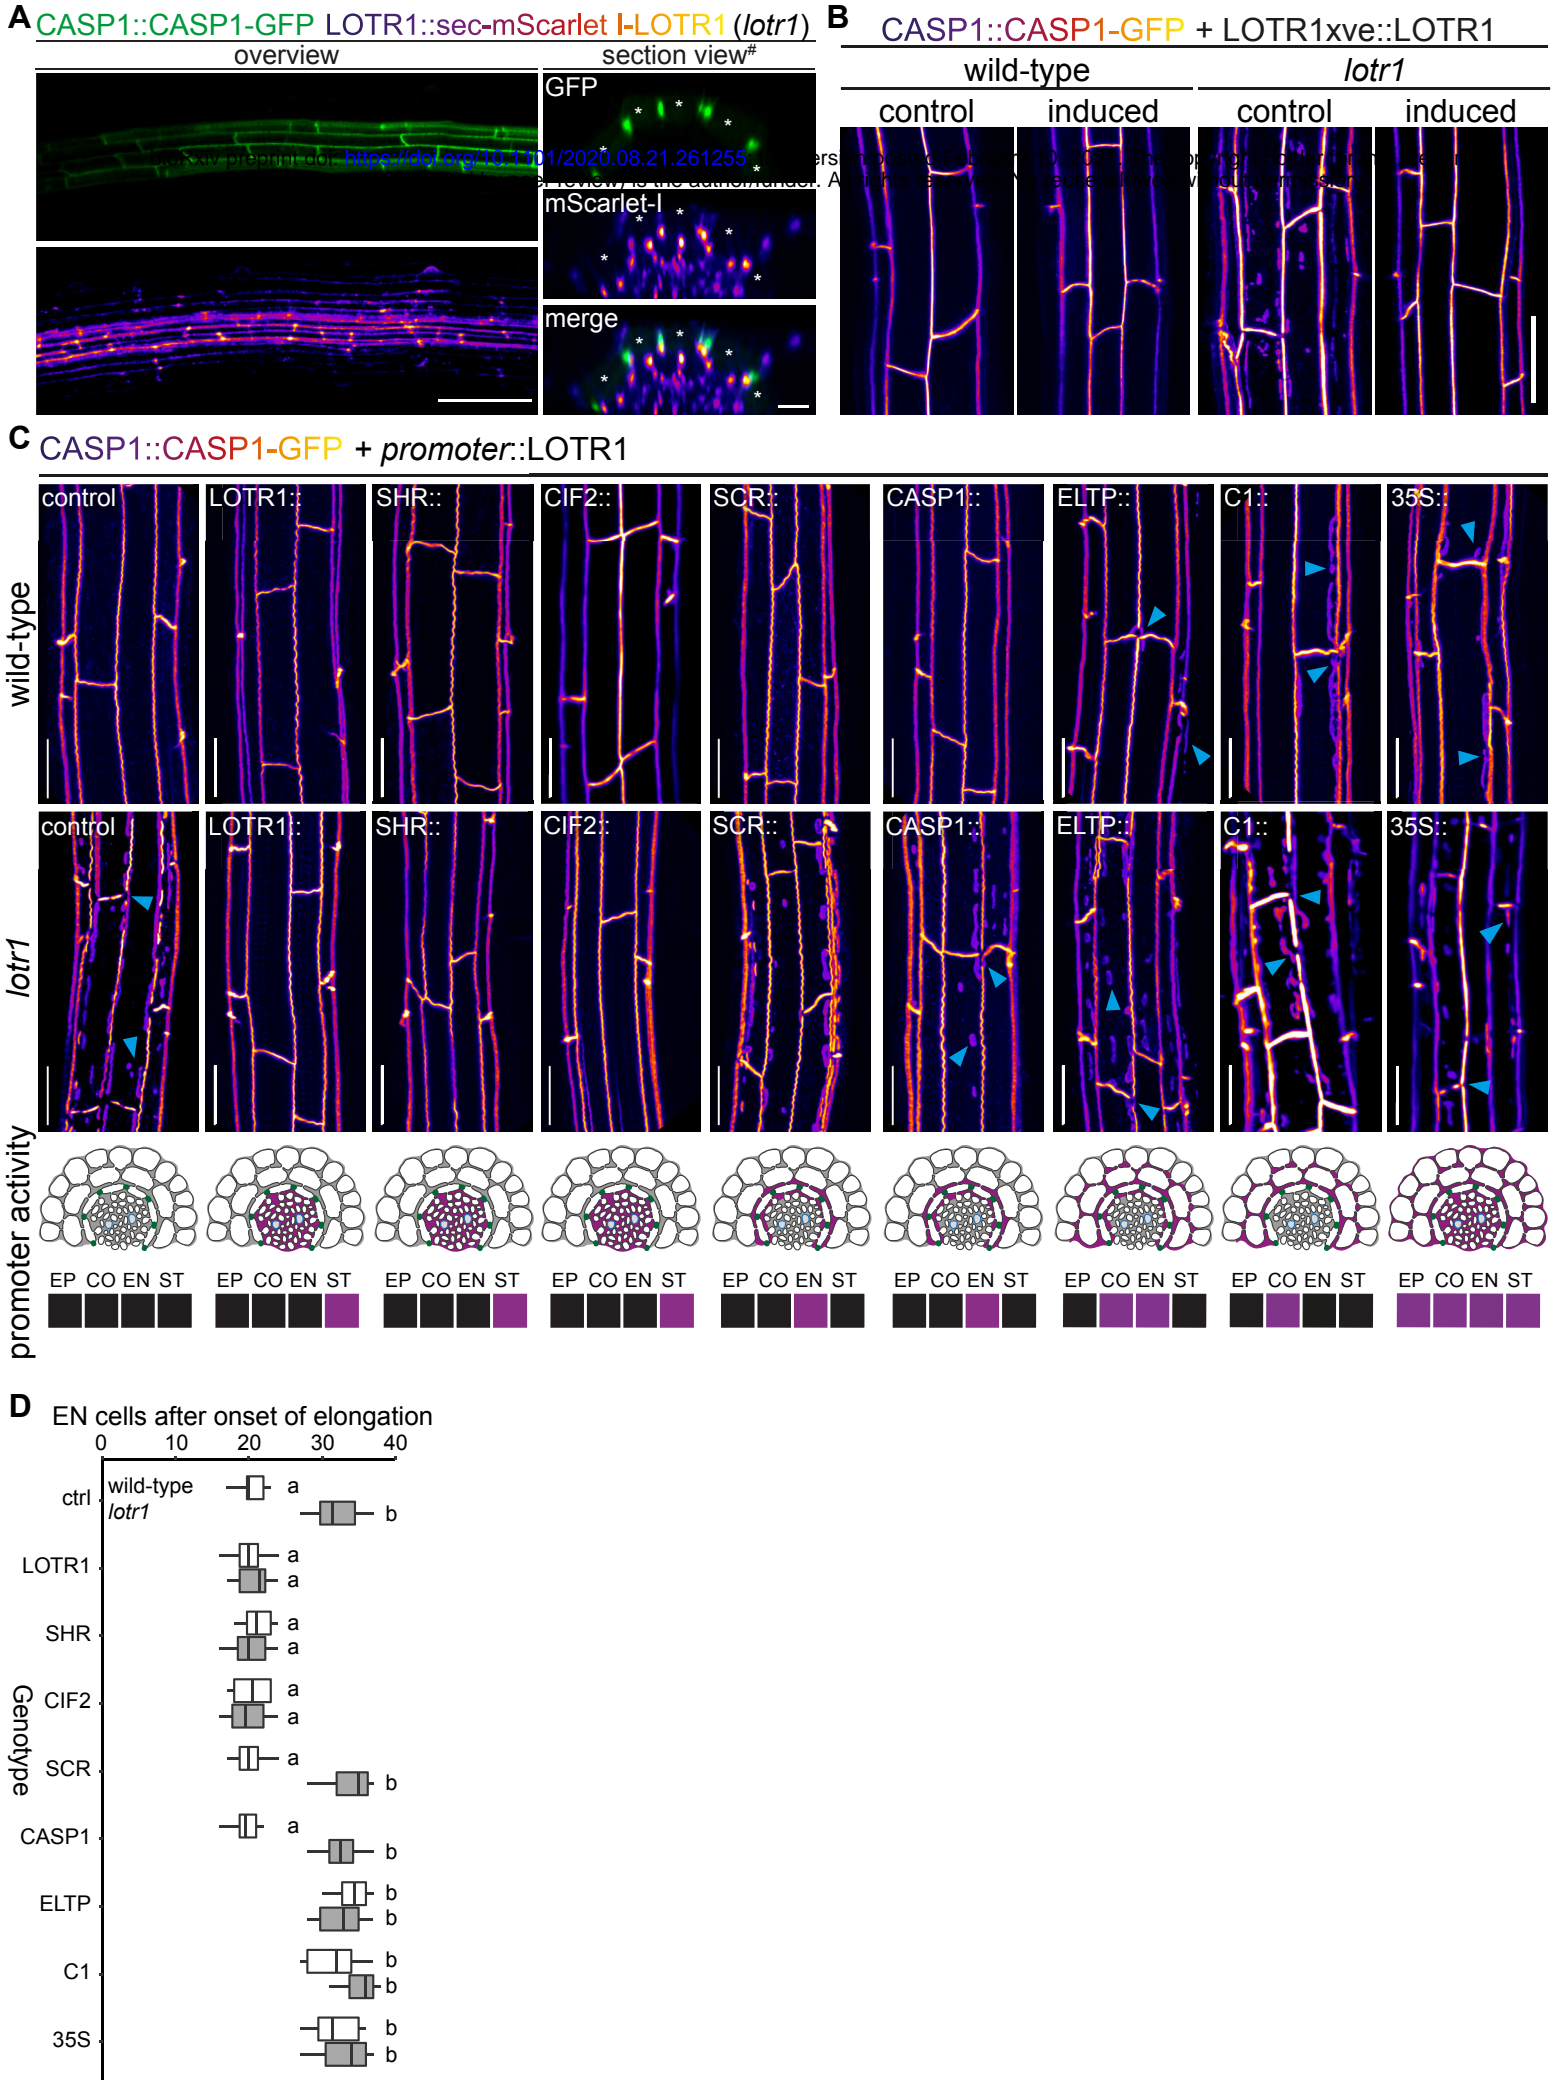

**Fig. 5**



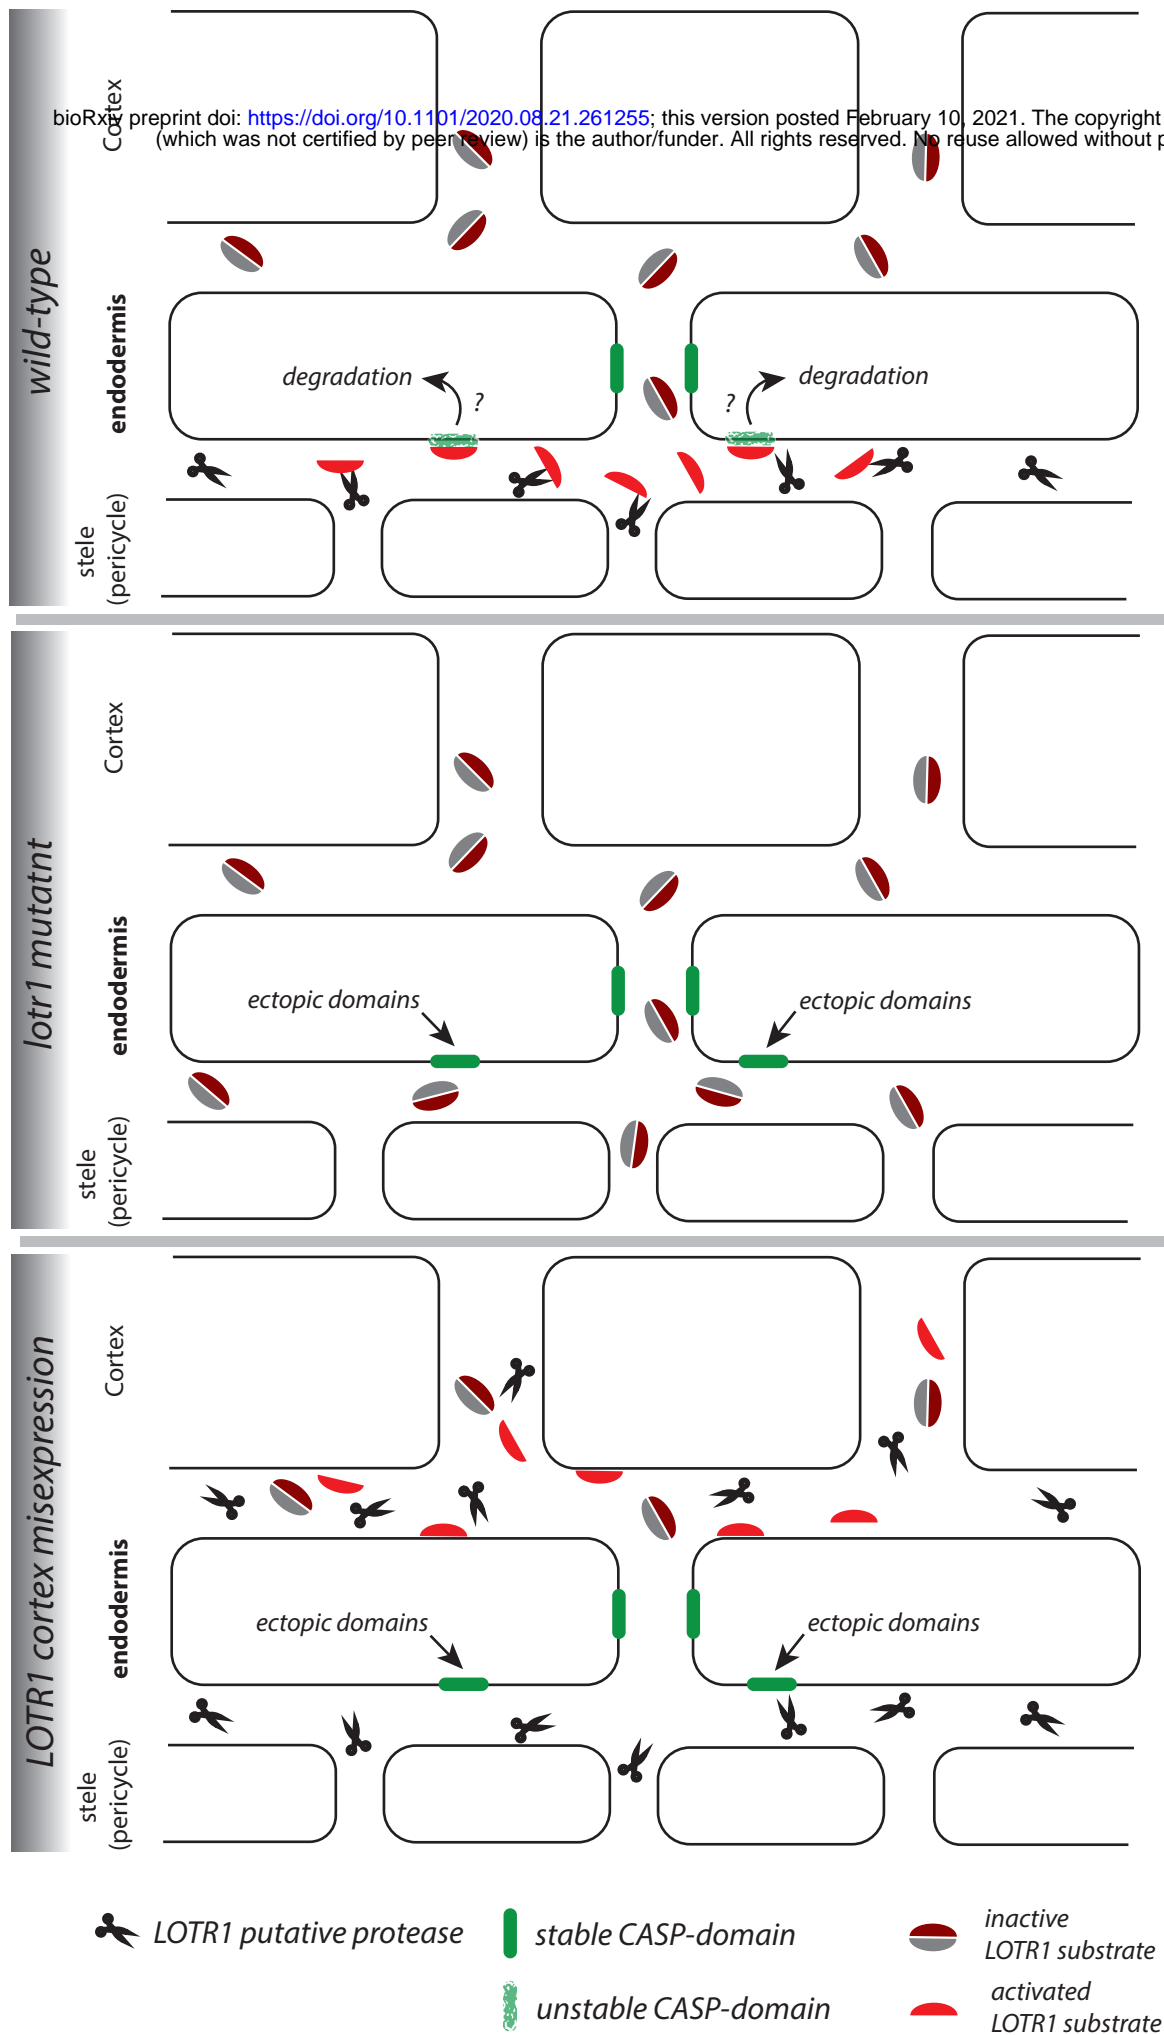

**Fig. 6**
